# Supplementary material for: GM-CSF impairs erythropoiesis by disrupting erythroblastic island formation via macrophages
Source: J Transl Med. 2022 Jan 3;20:11. doi: 10.1186/s12967-021-03214-5 (PMC8721478; doi:10.1186/s12967-021-03214-5)
Supplement: Supplementary file 12 — Additional file 12: Table S4. The differentially expressed genes between control and GM-CSF treated human macrophages. [file 12967_2021_3214_MOESM12_ESM.xls]

Gene ID	Gene Symbol	Type	GMCSF1 Expression	GMCSF2 Expression	GMCSF3 Expression	control1 Expression	control2 Expression	control3 Expression
650	BMP2	mRNA	1.56	1.56	1.9	0.88	0.48	0.84
5366	PMAIP1	mRNA	2.44	2.46	2.81	1.08	0.82	1.09
22875	ENPP4	mRNA	8.65	8.4	9.67	5.3	4.98	5.49
969	CD69	mRNA	0.24	0.19	0.32	0.0	0.0	0.03
1047	CLGN	mRNA	0.29	0.3	0.39	0.1	0.07	0.09
23580	CDC42EP4	mRNA	1.9	1.88	2.23	1.26	1.25	1.24
388962	BOLA3	mRNA	32.27	32.24	37.67	23.11	22.14	21.11
8128	ST8SIA2	mRNA	0.03	0.02	0.05	0.0	0.0	0.0
404203	SPINK6	mRNA	0.76	0.8	1.54	0.08	0.17	0.08
64105	CENPK	mRNA	5.97	6.23	7.82	3.93	3.45	4.66
55789	DEPDC1B	mRNA	3.39	3.48	4.31	1.82	1.68	2.19
84296	GINS4	mRNA	2.86	2.91	3.57	1.95	1.79	2.16
10403	NDC80	mRNA	4.86	5.29	6.84	3.15	2.66	3.28
342372	PKD1L3	mRNA	0.45	0.45	0.71	0.24	0.18	0.29
4751	NEK2	mRNA	3.37	3.81	4.84	1.81	2.57	2.55
83463	MXD3	mRNA	3.13	3.67	4.63	2.09	2.39	2.64
83879	CDCA7	mRNA	4.04	4.64	5.6	2.61	2.93	3.51
93081	TEX30	mRNA	4.83	5.71	7.0	2.99	3.32	4.03
157570	ESCO2	mRNA	3.8	4.54	5.26	2.92	2.71	3.14
91120	ZNF682	mRNA	0.99	1.21	1.44	0.66	0.74	0.76
4603	MYBL1	mRNA	0.52	0.67	0.88	0.29	0.29	0.34
55509	BATF3	mRNA	1.3	1.78	2.16	0.59	0.62	1.14
56992	KIF15	mRNA	1.89	2.39	2.76	0.84	1.07	1.56
23101	MCF2L2	mRNA	0.67	0.85	0.93	0.4	0.49	0.54
10024	TROAP	mRNA	5.91	8.05	8.71	2.85	3.9	4.32
55355	HJURP	mRNA	6.1	7.52	8.2	3.14	3.91	4.54
10535	RNASEH2A	mRNA	12.28	13.86	15.12	7.71	8.78	10.02
8208	CHAF1B	mRNA	3.9	3.86	4.66	2.22	2.64	3.46
6402	SELL	mRNA	0.72	0.66	0.76	0.21	0.26	0.39
84968	PNMA6A	mRNA	1.66	1.5	1.8	0.61	0.82	1.01
100529215	ZNF559-ZNF177	mRNA	0.28	0.33	0.4	0.0	0.04	0.16
10635	RAD51AP1	mRNA	12.57	12.99	15.44	6.69	6.96	8.94
29089	UBE2T	mRNA	8.59	8.82	10.84	3.83	5.06	6.14
5888	RAD51	mRNA	5.35	5.53	6.33	3.17	3.66	4.07
5357	PLS1	mRNA	0.58	0.33	0.61	0.16	0.29	0.23
922	CD5L	mRNA	0.15	0.07	0.2	0.02	0.03	0.0
201456	FBXO15	mRNA	0.81	0.5	0.85	0.19	0.25	0.12
181	AGRP	mRNA	1.66	1.05	1.92	0.41	0.33	0.19
728047	GOLGA8O	mRNA	0.79	0.64	1.02	0.57	0.23	0.44
375449	MAST4	mRNA	0.4	0.3	0.66	0.17	0.17	0.28
653820	FAM72B	mRNA	3.24	2.44	3.91	2.0	1.86	2.15
57576	KIF17	mRNA	0.43	0.27	0.5	0.11	0.09	0.17
3559	IL2RA	mRNA	2.55	3.68	3.58	1.81	2.22	1.61
113115	MTFR2	mRNA	2.82	4.37	4.31	2.35	2.29	1.94
102724560	CBSL	mRNA	2.88	3.76	4.21	1.41	2.42	1.58
388753	COA6	mRNA	20.04	22.89	25.93	14.39	16.77	14.73
23594	ORC6	mRNA	6.97	8.88	9.04	4.31	5.77	5.57
2775	GNAO1	mRNA	0.18	0.26	0.29	0.08	0.13	0.11
100526693	ARPC4-TTLL3	mRNA	4.63	6.32	6.38	2.99	3.74	3.23
91057	CCDC34	mRNA	2.29	3.41	3.8	2.0	1.61	2.03
728340	GTF2H2C	mRNA	5.86	8.21	8.88	5.25	4.58	4.62
441168	CALHM6	mRNA	4.24	6.55	7.51	2.84	2.38	2.53
10351	ABCA8	mRNA	0.05	0.1	0.11	0.02	0.02	0.02
3433	IFIT2	mRNA	0.98	1.59	2.72	0.81	0.91	0.86
367	AR	mRNA	0.03	0.08	0.13	0.02	0.01	0.01
201799	TMEM154	mRNA	0.35	0.56	0.87	0.24	0.23	0.17
4602	MYB	mRNA	0.32	0.68	0.54	0.15	0.15	0.28
10561	IFI44	mRNA	3.7	5.36	4.61	2.84	2.89	3.35
26271	FBXO5	mRNA	4.92	7.09	6.3	3.34	3.1	4.27
55244	SLC47A1	mRNA	1.4	2.01	1.73	0.99	0.91	1.15
89958	SAPCD2	mRNA	5.18	6.94	5.91	3.4	3.25	4.65
81610	FAM83D	mRNA	2.38	3.36	2.74	1.34	1.24	1.73
10894	LYVE1	mRNA	0.61	1.16	0.85	0.12	0.12	0.34
1164	CKS2	mRNA	28.0	39.87	40.09	15.15	17.41	21.15
332	BIRC5	mRNA	7.62	11.27	11.11	4.27	4.76	5.52
84255	SLC37A3	mRNA	0.55	0.88	0.78	0.27	0.31	0.39
3070	HELLS	mRNA	2.7	3.88	3.67	1.63	1.75	2.26
220134	SKA1	mRNA	3.78	5.12	4.71	2.21	2.38	3.03
3161	HMMR	mRNA	7.65	10.68	9.97	4.2	4.7	5.71
27338	UBE2S	mRNA	41.04	48.8	47.45	26.06	27.93	35.54
113130	CDCA5	mRNA	7.95	10.02	9.65	4.59	4.68	6.64
891	CCNB1	mRNA	16.1	20.17	19.68	8.72	9.12	13.12
4085	MAD2L1	mRNA	6.38	8.17	8.34	3.52	4.22	5.46
146909	KIF18B	mRNA	4.2	5.46	5.22	2.16	2.71	3.44
3833	KIFC1	mRNA	11.04	15.56	14.55	6.7	6.39	9.84
9212	AURKB	mRNA	10.95	15.4	14.11	5.78	6.54	9.7
79006	METRN	mRNA	1.53	2.04	1.83	0.98	1.11	1.38
54331	GNG2	mRNA	7.35	10.37	10.02	5.34	5.01	7.72
55872	PBK	mRNA	0.95	1.49	1.58	0.47	0.51	0.88
29127	RACGAP1	mRNA	11.25	14.08	14.55	8.04	7.5	10.44
54058	C21orf58	mRNA	2.29	3.1	3.22	1.44	1.97	2.14
63922	CHTF18	mRNA	4.1	6.59	6.74	3.25	3.63	4.06
80119	PIF1	mRNA	1.11	1.8	1.72	0.79	0.86	1.08
3148	HMGB2	mRNA	23.62	32.52	32.21	16.52	19.37	22.04
221468	TMEM217	mRNA	1.43	1.43	1.54	0.43	0.72	0.71
253982	ASPHD1	mRNA	7.83	7.9	8.16	2.76	3.68	3.5
4061	LY6E	mRNA	41.93	42.35	42.61	18.75	22.38	23.15
112812	FDX2	mRNA	15.04	14.65	14.92	7.09	8.15	8.53
128239	IQGAP3	mRNA	8.15	8.74	8.26	3.69	4.11	4.73
57761	TRIB3	mRNA	16.48	17.39	16.34	8.66	9.51	10.44
195828	ZNF367	mRNA	3.37	3.47	3.49	1.71	1.92	2.09
643847	PGA4	mRNA	38.75	40.35	39.51	24.41	26.56	27.03
10293	TRAIP	mRNA	2.24	2.21	2.31	1.18	1.32	1.48
55143	CDCA8	mRNA	7.55	7.94	8.0	3.64	4.4	5.19
3082	HGF	mRNA	0.75	0.85	0.83	0.17	0.4	0.43
24137	KIF4A	mRNA	3.27	3.81	3.75	1.56	1.88	2.23
4176	MCM7	mRNA	29.7	32.89	32.84	17.67	19.75	21.42
79682	CENPU	mRNA	5.36	6.31	6.05	2.4	3.01	3.32
4778	NFE2	mRNA	0.97	1.16	1.02	0.23	0.36	0.46
53826	FXYD6	mRNA	10.3	11.75	10.92	5.79	6.18	7.36
3978	LIG1	mRNA	8.1	8.72	8.34	4.8	5.06	5.82
284403	WDR62	mRNA	4.61	5.69	5.44	2.18	2.91	3.23
51191	HERC5	mRNA	2.98	3.53	3.44	1.83	2.23	2.36
4697	NDUFA4	mRNA	51.45	59.66	61.96	33.08	38.95	39.18
201254	CENPX	mRNA	27.06	31.88	31.61	16.94	19.69	19.92
2131	EXT1	mRNA	2.02	2.52	2.47	0.98	1.34	1.24
63910	SLC17A9	mRNA	28.12	29.23	30.73	17.27	19.52	19.05
64960	MRPS15	mRNA	56.96	60.84	64.65	35.62	39.82	38.03
55071	C9orf40	mRNA	5.51	5.6	6.27	2.83	3.35	3.57
79968	WDR76	mRNA	5.3	5.47	6.25	2.98	3.29	3.6
990	CDC6	mRNA	6.63	7.63	8.15	3.97	3.95	4.67
3299	HSF4	mRNA	5.5	6.54	6.88	2.64	2.71	3.23
4173	MCM4	mRNA	17.51	19.07	19.67	11.67	11.61	12.88
29028	ATAD2	mRNA	8.73	9.59	10.13	5.16	5.35	5.87
899	CCNF	mRNA	5.83	6.5	6.83	3.35	3.69	4.01
79017	GGCT	mRNA	32.56	36.09	37.06	20.26	22.79	24.43
146183	OTOA	mRNA	10.74	11.8	12.38	6.0	6.99	7.46
55839	CENPN	mRNA	7.02	8.46	8.57	3.0	3.8	3.81
10615	SPAG5	mRNA	8.5	9.7	10.12	4.79	5.22	5.43
375444	C5orf34	mRNA	1.39	1.54	1.56	0.82	0.88	0.92
79971	WLS	mRNA	1.17	1.42	1.32	0.41	0.53	0.98
991	CDC20	mRNA	17.6	21.09	20.08	9.26	10.01	13.75
89891	WDR34	mRNA	8.06	9.66	9.34	3.66	4.62	6.3
55723	ASF1B	mRNA	14.05	16.85	16.4	7.15	8.42	10.81
7083	TK1	mRNA	24.77	29.81	27.94	11.26	14.01	18.35
2305	FOXM1	mRNA	13.47	16.8	15.34	7.91	7.96	10.81
3014	H2AFX	mRNA	53.61	62.41	56.38	33.78	34.79	43.77
55010	PARPBP	mRNA	3.14	3.39	3.14	1.83	1.94	2.51
81620	CDT1	mRNA	10.15	10.35	9.67	5.3	5.37	6.95
374393	FAM111B	mRNA	7.43	7.95	7.6	3.89	4.21	5.36
4171	MCM2	mRNA	14.39	14.95	14.55	8.59	8.88	10.69
51162	EGFL7	mRNA	13.97	14.68	14.12	7.23	7.31	9.51
6948	TCN2	mRNA	24.39	25.65	25.22	14.33	13.78	17.81
1869	E2F1	mRNA	7.92	8.62	8.74	4.04	3.66	5.55
57559	STAMBPL1	mRNA	3.54	3.83	3.8	2.26	2.19	2.86
4605	MYBL2	mRNA	17.03	18.72	19.17	9.24	8.32	11.24
79022	TMEM106C	mRNA	19.18	21.43	22.0	10.6	10.14	13.35
5347	PLK1	mRNA	21.73	25.26	25.21	11.55	11.45	15.55
7298	TYMS	mRNA	32.35	38.54	38.27	16.12	17.28	22.19
6241	RRM2	mRNA	28.96	33.88	34.15	14.53	15.26	20.04
1163	CKS1B	mRNA	23.98	26.77	27.06	12.53	12.82	15.9
6941	TCF19	mRNA	12.51	13.89	14.11	6.28	6.39	8.7
55165	CEP55	mRNA	12.34	15.89	16.51	6.98	7.78	8.71
9232	PTTG1	mRNA	17.68	24.16	25.73	8.15	9.85	11.85
151246	SGO2	mRNA	3.82	4.69	4.69	2.53	2.79	3.05
146956	EME1	mRNA	1.88	2.27	2.3	1.15	1.27	1.46
131450	CD200R1	mRNA	3.44	5.1	5.38	0.81	0.63	1.28
29128	UHRF1	mRNA	7.99	9.38	9.51	5.3	5.26	5.76
1759	DNM1	mRNA	7.4	9.83	10.1	3.44	3.41	4.01
3015	H2AFZ	mRNA	122.33	148.4	153.15	79.52	82.54	95.55
4001	LMNB1	mRNA	17.02	20.69	21.55	9.6	9.8	11.98
10051	SMC4	mRNA	12.49	14.74	15.38	8.26	8.29	9.44
6355	CCL8	mRNA	37.02	47.43	50.55	17.19	20.71	20.43
79733	E2F8	mRNA	3.34	4.0	4.31	1.89	2.09	2.16
63967	CLSPN	mRNA	3.91	4.54	4.87	2.49	2.63	2.71
51126	NAA20	mRNA	72.44	82.89	90.33	52.17	54.78	57.29
26521	TIMM8B	mRNA	28.8	32.4	35.5	20.28	22.03	21.66
10462	CLEC10A	mRNA	21.89	29.43	30.81	9.13	10.27	9.84
55635	DEPDC1	mRNA	2.29	3.1	3.28	1.19	1.21	1.17
83540	NUF2	mRNA	4.0	5.27	5.66	2.62	2.52	2.7
9768	PCLAF	mRNA	10.75	14.44	15.17	7.0	7.05	7.85
55706	NDC1	mRNA	6.92	7.44	8.23	4.69	4.53	5.09
56942	CMC2	mRNA	18.78	20.34	22.38	13.03	12.22	13.88
9787	DLGAP5	mRNA	4.41	5.26	6.07	2.33	2.34	3.05
9824	ARHGAP11A	mRNA	4.19	4.87	5.37	2.5	2.52	2.99
55329	MNS1	mRNA	1.59	2.0	2.22	0.87	0.77	1.19
11065	UBE2C	mRNA	23.37	28.85	31.87	12.43	12.28	18.52
90381	TICRR	mRNA	1.38	1.64	1.71	0.79	0.84	1.1
8438	RAD54L	mRNA	2.86	3.35	3.47	1.72	1.87	2.36
54443	ANLN	mRNA	9.53	11.98	12.17	5.0	5.05	7.2
11004	KIF2C	mRNA	6.69	8.21	8.5	3.26	3.45	4.78
9133	CCNB2	mRNA	14.59	18.67	19.03	7.0	7.57	10.4
83461	CDCA3	mRNA	5.37	6.2	6.72	2.83	2.74	3.98
2175	FANCA	mRNA	4.48	4.89	5.39	2.82	2.86	3.6
2237	FEN1	mRNA	16.61	18.29	18.98	10.75	11.06	13.44
84057	MND1	mRNA	2.34	2.63	2.92	0.99	0.96	1.5
2350	FOLR2	mRNA	99.37	116.4	125.59	36.23	35.82	59.41
57405	SPC25	mRNA	9.59	12.85	12.7	7.65	6.96	8.39
57001	SDHAF3	mRNA	2.44	3.4	3.59	1.95	1.61	2.07
79145	CHCHD7	mRNA	13.56	16.74	16.99	10.22	9.38	11.76
79075	DSCC1	mRNA	2.38	3.05	3.2	1.54	1.39	2.0
51512	GTSE1	mRNA	6.82	8.92	9.12	4.32	4.05	5.22
1033	CDKN3	mRNA	9.47	13.15	14.53	4.87	4.78	6.98
81930	KIF18A	mRNA	1.44	1.74	1.95	0.96	0.79	1.11
7272	TTK	mRNA	3.41	4.62	4.91	2.31	1.87	2.54
79915	ATAD5	mRNA	1.42	1.74	1.8	1.11	1.01	1.2
339541	ARMH1	mRNA	0.71	0.92	1.03	0.5	0.35	0.42
25788	RAD54B	mRNA	1.77	1.99	2.22	1.24	1.01	1.27
5983	RFC3	mRNA	5.69	6.51	7.3	4.04	3.46	4.04
100529261	CHURC1-FNTB	mRNA	2.49	3.17	3.48	1.25	0.99	1.2
7112	TMPO	mRNA	29.58	33.29	35.26	21.35	20.01	22.24
8491	MAP4K3	mRNA	5.29	6.14	6.37	3.01	2.56	3.04
23468	CBX5	mRNA	5.91	6.55	6.8	4.27	3.94	4.19
79444	BIRC7	mRNA	0.98	1.31	1.45	0.23	0.08	0.15
9156	EXO1	mRNA	3.23	3.86	3.82	2.44	2.19	2.21
2258	FGF13	mRNA	0.86	1.34	1.25	0.27	0.15	0.25
10592	SMC2	mRNA	6.82	8.25	8.14	5.24	4.7	5.11
1515	CTSV	mRNA	1.04	1.46	1.45	0.66	0.51	0.65
139886	SPIN4	mRNA	1.46	1.8	1.81	0.93	0.65	0.9
57172	CAMK1G	mRNA	0.76	1.13	1.17	0.35	0.08	0.25
26471	NUPR1	mRNA	9.31	9.39	10.6	4.47	4.93	5.93
23306	NEMP1	mRNA	6.47	6.74	7.09	4.09	4.26	4.84
359845	RFLNB	mRNA	4.98	5.2	5.52	2.4	2.57	3.21
116843	SLC18B1	mRNA	9.78	9.83	10.96	5.37	5.18	6.87
8318	CDC45	mRNA	6.07	6.18	6.45	3.77	3.62	4.51
3033	HADH	mRNA	19.86	20.7	21.86	12.78	12.23	14.92
9833	MELK	mRNA	9.13	9.76	10.21	5.13	4.82	6.23
9314	KLF4	mRNA	7.55	8.01	8.35	2.96	3.19	3.86
817	CAMK2D	mRNA	8.19	8.57	8.8	4.18	4.33	4.71
5631	PRPS1	mRNA	19.44	20.51	20.64	13.0	12.93	14.24
84515	MCM8	mRNA	3.9	4.26	4.22	2.53	2.46	2.73
55536	CDCA7L	mRNA	10.79	11.71	12.21	6.12	5.57	6.98
2857	GPR34	mRNA	112.91	117.99	122.02	78.65	73.58	80.22
25934	NIPSNAP3A	mRNA	14.49	14.94	16.38	9.2	8.36	9.99
9088	PKMYT1	mRNA	11.29	12.01	13.3	5.71	5.73	6.95
51434	ANAPC7	mRNA	26.64	27.13	29.02	17.86	17.53	19.06
6712	SPTBN2	mRNA	0.25	0.28	0.28	0.14	0.08	0.13
8767	RIPK2	mRNA	12.85	13.58	13.76	9.23	7.85	9.13
11200	CHEK2	mRNA	7.03	7.69	7.73	4.93	4.19	4.83
51474	LIMA1	mRNA	13.25	14.1	14.24	9.74	8.53	9.43
481	ATP1B1	mRNA	49.28	50.75	52.04	24.87	18.07	25.63
5567	PRKACB	mRNA	19.09	19.94	20.65	11.02	9.1	11.17
90417	KNSTRN	mRNA	8.01	8.52	8.55	5.69	5.05	5.48
9429	ABCG2	mRNA	4.34	4.56	4.66	1.77	1.07	1.59
1235	CCR6	mRNA	1.83	1.95	1.97	1.21	0.9	1.32
144193	AMDHD1	mRNA	3.19	3.21	3.48	1.56	0.94	1.82
135112	NCOA7	mRNA	4.79	5.14	4.99	3.35	2.85	3.46
8857	FCGBP	mRNA	43.42	47.62	46.24	13.09	8.46	19.34
391059	FRRS1	mRNA	6.21	6.5	6.59	3.84	3.29	4.14
112267968	LOC112267968	mRNA	0.07	0.08	0.08	0.01	0.0	0.02
3832	KIF11	mRNA	6.85	7.96	8.14	4.15	3.97	5.34
54478	PIMREG	mRNA	1.75	2.3	2.32	0.7	0.58	1.11
51053	GMNN	mRNA	17.25	21.27	21.85	10.86	10.13	13.0
10721	POLQ	mRNA	2.02	2.46	2.49	1.28	1.19	1.53
983	CDK1	mRNA	21.71	27.44	28.69	11.32	9.12	14.43
151887	CCDC80	mRNA	0.71	0.89	0.91	0.38	0.3	0.48
151648	SGO1	mRNA	2.27	2.7	2.71	1.4	1.28	1.61
672	BRCA1	mRNA	4.89	5.55	5.61	3.18	2.91	3.61
54892	NCAPG2	mRNA	9.41	10.78	11.14	5.66	5.06	6.46
9928	KIF14	mRNA	2.31	2.76	2.77	1.31	1.25	1.5
11130	ZWINT	mRNA	19.85	23.62	23.07	12.41	11.34	14.02
5139	PDE3A	mRNA	0.17	0.24	0.23	0.03	0.01	0.05
9687	GREB1	mRNA	2.18	2.48	2.43	1.35	1.13	1.54
2013	EMP2	mRNA	1.87	2.14	2.12	1.21	1.02	1.3
10733	PLK4	mRNA	3.4	3.99	3.91	2.13	1.95	2.58
6491	STIL	mRNA	3.36	3.94	3.79	2.32	2.03	2.62
1031	CDKN2C	mRNA	11.29	14.84	12.99	5.59	4.42	7.08
57332	CBX8	mRNA	1.98	2.36	2.14	1.16	1.12	1.46
147841	SPC24	mRNA	4.44	5.44	4.88	2.62	2.45	3.19
10112	KIF20A	mRNA	6.35	8.27	7.29	2.96	2.5	4.17
55215	FANCI	mRNA	5.24	5.95	5.75	3.3	3.1	4.11
79019	CENPM	mRNA	11.92	15.07	14.29	4.79	4.65	7.91
1719	DHFR	mRNA	14.24	15.91	15.52	8.42	7.97	10.01
51514	DTL	mRNA	4.63	5.21	4.92	2.55	2.4	3.26
150468	CKAP2L	mRNA	3.57	4.77	4.3	2.02	1.91	2.32
729230	CCR2	mRNA	1.1	1.6	1.42	0.37	0.41	0.56
5733	PTGER3	mRNA	0.96	1.35	1.28	0.27	0.35	0.45
1058	CENPA	mRNA	5.27	7.18	6.93	2.25	2.37	3.06
5111	PCNA	mRNA	59.73	70.45	67.35	40.26	40.74	46.04
2162	F13A1	mRNA	283.06	402.28	369.52	52.42	45.07	93.8
3925	STMN1	mRNA	56.33	73.76	73.33	27.61	29.22	38.83
9401	RECQL4	mRNA	4.43	5.41	5.23	3.2	3.16	3.65
9700	ESPL1	mRNA	3.3	3.93	3.85	2.21	2.2	2.62
701	BUB1B	mRNA	7.04	8.79	8.53	3.22	3.23	4.71
6790	AURKA	mRNA	13.38	15.88	15.45	8.74	9.37	10.53
51203	NUSAP1	mRNA	18.31	22.29	21.82	10.34	11.68	14.13
9837	GINS1	mRNA	3.9	4.79	4.66	2.77	2.17	3.28
9493	KIF23	mRNA	5.03	6.22	5.95	2.86	2.29	4.09
7153	TOP2A	mRNA	19.55	25.04	23.77	11.6	10.15	15.75
1062	CENPE	mRNA	2.46	3.07	2.84	1.83	1.54	1.99
83990	BRIP1	mRNA	1.26	1.75	1.57	0.89	0.71	0.97
57650	CIP2A	mRNA	2.92	3.68	3.52	2.12	1.95	2.31
79801	SHCBP1	mRNA	9.57	12.67	11.87	6.04	5.73	7.12
57082	KNL1	mRNA	2.09	2.67	2.51	1.39	1.3	1.61
9055	PRC1	mRNA	13.57	18.56	17.03	7.59	7.82	10.06
22974	TPX2	mRNA	14.6	18.71	17.33	8.68	8.64	11.02
84904	ARHGEF39	mRNA	2.81	3.6	3.34	1.73	1.76	2.22
890	CCNA2	mRNA	12.97	16.42	15.33	7.68	7.15	9.82
2205	FCER1A	mRNA	0.77	1.21	1.04	0.23	0.13	0.45
7465	WEE1	mRNA	3.73	4.06	4.33	2.54	2.23	3.32
157313	CDCA2	mRNA	2.18	2.35	2.68	1.36	1.11	1.73
221150	SKA3	mRNA	3.75	4.13	4.51	1.94	1.62	2.6
51659	GINS2	mRNA	10.1	10.95	12.63	5.02	3.99	6.49
26227	PHGDH	mRNA	3.02	4.08	3.89	1.65	0.84	1.88
4784	NFIX	mRNA	0.11	0.15	0.13	0.05	0.0	0.05
22847	ZNF507	mRNA	0.36	0.44	0.39	0.22	0.15	0.28
1870	E2F2	mRNA	5.56	5.81	5.68	3.87	3.22	4.42
26034	IPCEF1	mRNA	3.21	3.52	3.38	1.76	1.47	2.26
57636	ARHGAP23	mRNA	1.09	1.25	1.11	0.47	0.31	0.65
203328	SUSD3	mRNA	15.08	17.29	15.96	9.22	7.98	11.15
400410	ST20	lncRNA	12.89	9.31	7.81	6.89	6.28	4.85
666	BOK	mRNA	1.03	0.85	0.65	0.41	0.3	0.39
338442	HCAR2	mRNA	0.19	0.13	0.07	0.0	0.0	0.0
256076	COL6A5	mRNA	0.06	0.04	0.02	0.0	0.01	0.0
219865	OR8G5	mRNA	1.35	1.01	0.83	0.09	0.29	0.05
100506736	SLFN12L	mRNA	0.21	0.17	0.13	0.03	0.06	0.03
4353	MPO	mRNA	5.68	4.29	3.81	1.74	2.01	1.57
150165	XKR3	mRNA	0.76	0.6	0.47	0.18	0.15	0.09
55281	TMEM140	mRNA	7.66	4.84	5.95	4.26	3.34	2.7
347404	LANCL3	mRNA	0.9	0.61	0.69	0.34	0.35	0.3
3753	KCNE1	mRNA	0.99	0.66	0.8	0.33	0.32	0.27
6840	SVIL	mRNA	2.5	1.86	2.04	1.03	1.07	0.92
389692	MAFA	mRNA	0.29	0.15	0.17	0.02	0.0	0.02
4646	MYO6	mRNA	1.44	1.04	1.18	0.74	0.77	0.8
23612	PHLDA3	mRNA	11.16	9.19	9.43	5.72	7.64	5.09
199675	MCEMP1	mRNA	13.41	9.73	10.53	6.74	7.94	5.06
4862	NPAS2	mRNA	1.14	0.83	0.87	0.54	0.6	0.37
360	AQP3	mRNA	4.78	3.41	2.98	1.05	1.64	0.49
941	CD80	mRNA	12.25	9.78	9.92	6.22	6.96	5.76
8613	PLPP3	mRNA	11.87	10.08	10.3	7.32	7.98	6.33
64757	MARC1	mRNA	1.65	1.04	1.34	0.65	0.94	0.31
8631	SKAP1	mRNA	0.91	0.68	0.88	0.29	0.35	0.13
8572	PDLIM4	mRNA	8.3	6.74	7.38	4.59	4.92	3.04
29126	CD274	mRNA	7.23	6.25	7.05	4.45	4.88	3.14
388121	TNFAIP8L3	mRNA	5.73	5.23	6.22	4.26	3.58	2.73
5569	PKIA	mRNA	3.86	3.8	4.55	2.89	2.94	1.78
199221	DZIP1L	mRNA	1.22	1.27	1.39	0.75	0.97	0.69
64091	POPDC2	mRNA	0.73	0.71	0.85	0.08	0.31	0.14
9717	SEC14L5	mRNA	1.36	1.3	1.51	0.69	0.96	0.75
23590	PDSS1	mRNA	8.25	9.55	10.2	5.41	6.18	5.11
23682	RAB38	mRNA	1.63	1.72	2.0	0.93	1.09	0.92
1666	DECR1	mRNA	44.37	47.02	49.93	31.39	32.76	30.9
7039	TGFA	mRNA	2.8	3.07	3.53	1.94	1.95	1.36
7525	YES1	mRNA	8.9	9.86	10.82	6.09	5.86	4.82
6819	SULT1C2	mRNA	2.07	2.42	2.76	1.26	1.23	1.07
1154	CISH	mRNA	56.35	56.5	58.03	24.83	27.96	20.52
341	APOC1	mRNA	80.11	81.53	81.32	32.33	37.29	28.15
55179	FAIM	mRNA	12.24	12.58	13.16	7.54	7.95	7.04
3115	HLA-DPB1	mRNA	42.71	43.1	45.43	25.39	26.14	22.52
51365	PLA1A	mRNA	0.63	0.67	0.7	0.03	0.09	0.0
54507	ADAMTSL4	mRNA	69.12	69.18	72.38	35.64	38.26	34.33
81706	PPP1R14C	mRNA	8.06	8.12	8.85	2.76	3.26	2.55
3957	LGALS2	mRNA	2.65	2.8	3.03	0.87	1.38	0.76
7378	UPP1	mRNA	45.36	48.33	48.17	30.06	32.92	28.36
323	APBB2	mRNA	1.51	1.62	1.65	0.54	0.78	0.54
84807	NFKBID	mRNA	25.18	27.18	27.79	13.45	15.88	13.21
54149	C21orf91	mRNA	1.4	1.34	1.48	0.89	0.93	0.73
3290	HSD11B1	mRNA	2.92	2.93	3.29	0.99	1.06	0.37
7850	IL1R2	mRNA	8.4	8.18	8.84	3.99	4.43	3.14
10261	IGSF6	mRNA	348.53	336.62	366.49	185.82	196.66	151.27
388372	CCL4L1	mRNA	62.01	58.97	65.53	33.98	39.8	24.72
6385	SDC4	mRNA	15.79	15.45	16.14	8.73	10.11	7.18
3119	HLA-DQB1	mRNA	82.53	89.48	90.18	55.64	62.87	47.84
910	CD1B	mRNA	10.79	12.8	12.77	5.53	5.86	3.54
57464	STRIP2	mRNA	2.45	2.54	2.81	1.6	1.8	1.26
1118	CHIT1	mRNA	5.15	5.51	6.09	2.34	2.74	1.67
9456	HOMER1	mRNA	1.37	1.53	1.66	0.62	0.82	0.51
3728	JUP	mRNA	7.28	7.3	6.41	4.26	5.21	3.83
126326	GIPC3	mRNA	1.21	1.09	0.88	0.56	0.69	0.43
55607	PPP1R9A	mRNA	0.2	0.19	0.15	0.08	0.11	0.05
116496	FAM129A	mRNA	18.5	18.0	16.33	11.34	10.48	8.45
55655	NLRP2	mRNA	12.61	12.41	11.2	8.07	8.0	6.67
8728	ADAM19	mRNA	3.62	3.37	3.08	2.24	2.09	1.8
116379	IL22RA2	mRNA	1.24	1.15	0.92	0.4	0.36	0.25
5923	RASGRF1	mRNA	2.09	1.99	1.69	0.77	0.57	0.42
3759	KCNJ2	mRNA	2.29	2.05	1.88	1.27	1.26	0.94
57538	ALPK3	mRNA	0.46	0.41	0.34	0.19	0.2	0.11
126321	MFSD12	mRNA	189.7	174.52	166.92	119.26	123.51	110.88
51560	RAB6B	mRNA	0.8	0.69	0.6	0.18	0.18	0.11
54360	CYTL1	mRNA	9.68	8.91	7.93	4.59	4.58	4.09
100462983	MTRNR2L3	mRNA	6.69	6.65	6.35	4.52	4.9	3.3
653567	TMEM236	mRNA	20.79	21.79	20.27	13.29	14.62	10.79
64078	SLC28A3	mRNA	13.6	13.51	13.04	8.61	8.76	6.57
22979	EFR3B	mRNA	0.52	0.51	0.48	0.24	0.29	0.15
25937	WWTR1	mRNA	0.27	0.26	0.25	0.1	0.13	0.03
6362	CCL18	mRNA	17.39	18.05	18.51	12.43	13.16	8.77
79839	CCDC102B	mRNA	3.84	3.96	4.01	1.95	2.14	1.22
158219	TTC39B	mRNA	5.28	5.27	5.38	3.28	3.43	2.57
5911	RAP2A	mRNA	43.26	42.5	43.9	31.36	30.18	25.25
57091	CASS4	mRNA	3.59	3.51	3.6	2.43	2.42	1.69
7052	TGM2	mRNA	46.05	38.58	37.64	21.33	21.72	11.36
2878	GPX3	mRNA	30.52	26.02	26.54	15.67	15.88	8.15
8013	NR4A3	mRNA	2.28	1.85	1.92	1.05	0.97	0.41
1382	CRABP2	mRNA	26.82	21.96	19.78	12.08	12.8	5.52
344	APOC2	mRNA	16.95	14.7	14.34	10.64	10.58	7.19
5414	SEPT4	mRNA	0.48	0.38	0.43	0.21	0.16	0.03
4360	MRC1	mRNA	857.46	819.91	814.89	566.58	538.91	426.26
348	APOE	mRNA	356.96	344.11	335.1	246.85	227.73	181.64
6769	STAC	mRNA	20.37	17.4	18.12	7.41	8.46	3.97
3563	IL3RA	mRNA	16.0	14.29	14.64	5.53	6.44	3.02
1636	ACE	mRNA	79.12	71.27	72.99	49.29	49.09	37.72
4013	VWA5A	mRNA	48.14	42.43	44.74	25.49	25.39	19.17
5140	PDE3B	mRNA	7.56	6.58	7.11	4.28	4.05	3.04
53834	FGFRL1	mRNA	28.33	24.0	25.06	15.75	13.99	12.05
4046	LSP1	mRNA	313.74	257.89	263.13	146.88	134.5	104.8
84216	TMEM117	mRNA	4.39	3.97	3.99	2.86	2.8	2.46
9076	CLDN1	mRNA	1.78	1.52	1.5	0.75	0.81	0.54
7453	WARS	mRNA	101.81	88.79	91.43	63.15	63.18	51.9
7042	TGFB2	mRNA	0.44	0.33	0.36	0.09	0.12	0.02
54852	PAQR5	mRNA	5.79	4.66	5.01	2.42	2.64	1.83
10090	UST	mRNA	2.43	2.69	2.26	1.78	1.34	1.57
51268	PIPOX	mRNA	1.22	1.24	1.16	0.81	0.62	0.76
6711	SPTBN1	mRNA	3.58	3.64	3.12	1.6	0.98	1.42
5657	PRTN3	mRNA	2.9	2.59	2.13	1.23	0.5	0.97
102723996	LOC102723996	mRNA	3.31	3.24	2.71	1.63	0.62	1.24
283431	GAS2L3	mRNA	19.72	17.91	16.2	12.1	10.19	11.06
23143	LRCH1	mRNA	8.83	8.56	7.53	6.08	5.2	5.37
1363	CPE	mRNA	1.65	1.4	1.31	0.67	0.59	0.84
10068	IL18BP	mRNA	89.06	75.24	73.62	47.33	39.82	47.33
9265	CYTH3	mRNA	5.49	4.75	4.83	3.46	2.96	3.53
57482	KIAA1211	mRNA	1.33	1.13	1.22	0.84	0.65	0.84
2672	GFI1	mRNA	0.65	0.56	0.53	0.29	0.14	0.3
816	CAMK2B	mRNA	0.98	0.65	0.77	0.16	0.16	0.18
2051	EPHB6	mRNA	3.56	3.16	3.23	1.99	2.02	2.17
91694	LONRF1	mRNA	7.62	6.78	7.08	4.31	4.18	4.53
7512	XPNPEP2	mRNA	0.32	0.26	0.27	0.09	0.07	0.09
29948	OSGIN1	mRNA	22.35	18.37	18.14	11.55	10.6	10.58
8854	ALDH1A2	mRNA	6.91	4.83	4.91	1.2	1.25	0.76
23221	RHOBTB2	mRNA	10.25	9.02	8.92	5.95	6.16	5.66
80381	CD276	mRNA	144.35	127.19	127.84	86.42	86.45	82.77
56262	LRRC8A	mRNA	10.07	9.11	9.05	6.38	6.12	6.14
311	ANXA11	mRNA	275.84	239.84	231.93	127.44	123.01	117.26
57522	SRGAP1	mRNA	1.43	1.32	1.31	0.87	0.86	0.87
201501	ZBTB7C	mRNA	1.23	1.02	1.06	0.33	0.3	0.32
10395	DLC1	mRNA	1.77	1.39	1.39	0.33	0.36	0.4
22905	EPN2	mRNA	1.05	0.85	0.83	0.29	0.25	0.29
1040	CDS1	mRNA	1.33	1.14	1.22	0.72	0.68	0.64
402778	IFITM10	mRNA	40.73	33.87	35.77	16.82	16.3	14.78
9516	LITAF	mRNA	159.42	144.57	148.14	103.01	100.29	96.85
22808	MRAS	mRNA	24.61	20.86	21.73	12.34	11.4	10.04
284129	SLC26A11	mRNA	60.09	52.24	53.86	27.81	26.63	23.19
203100	HTRA4	mRNA	9.56	8.34	8.56	4.6	4.03	4.09
1509	CTSD	mRNA	8256.13	7243.52	7546.26	5199.06	4993.88	5099.48
5098	PCDHGC3	mRNA	8.6	7.27	7.22	5.48	4.29	4.81
56975	FAM20C	mRNA	157.54	130.88	131.88	102.5	88.9	90.05
914	CD2	mRNA	0.98	0.77	0.8	0.31	0.1	0.12
60370	AVPI1	mRNA	13.84	11.58	12.26	7.62	5.78	6.6
89797	NAV2	mRNA	0.44	0.35	0.38	0.16	0.1	0.11
923	CD6	mRNA	0.27	0.24	0.24	0.1	0.03	0.04
148252	DIRAS1	mRNA	11.58	10.95	10.62	7.54	6.22	6.89
23017	FAIM2	mRNA	0.32	0.25	0.33	0.1	0.03	0.03
63898	SH2D4A	mRNA	0.64	0.46	0.65	0.18	0.13	0.06
124599	CD300LB	mRNA	1.73	1.29	1.59	0.93	0.8	0.64
55686	MREG	mRNA	10.7	9.35	9.87	7.06	6.12	5.17
1368	CPM	mRNA	31.33	27.48	30.46	22.12	19.29	17.16
2167	FABP4	mRNA	2.29	1.84	2.18	1.02	0.79	0.53
5521	PPP2R2B	mRNA	0.59	0.57	0.53	0.28	0.03	0.05
22982	DIP2C	mRNA	0.65	0.58	0.57	0.37	0.21	0.15
23034	SAMD4A	mRNA	4.69	4.13	3.85	2.9	2.33	2.28
1284	COL4A2	mRNA	0.79	0.7	0.67	0.45	0.35	0.29
50650	ARHGEF3	mRNA	9.86	8.9	8.76	6.49	5.56	5.01
167465	ZNF366	mRNA	8.55	7.28	6.85	3.76	2.78	2.62
9980	DOP1B	mRNA	23.08	20.24	20.09	13.18	10.89	10.71
6539	SLC6A12	mRNA	3.47	3.2	3.24	2.02	1.69	1.49
9792	SERTAD2	mRNA	10.97	9.96	9.93	6.76	5.67	5.34
1296	COL8A2	mRNA	3.27	2.81	2.77	1.3	0.92	0.56
23078	VWA8	mRNA	6.65	6.58	6.15	4.77	3.93	3.62
79083	MLPH	mRNA	2.96	2.88	2.69	1.67	1.27	1.08
2	A2M	mRNA	174.75	168.06	162.59	109.62	92.43	82.93
4892	NRAP	mRNA	0.05	0.09	0.02	0.0	0.01	0.0
54821	ERCC6L	mRNA	1.21	1.48	0.99	0.55	0.69	0.77
22807	IKZF2	mRNA	0.49	0.59	0.4	0.24	0.31	0.31
79689	STEAP4	mRNA	0.69	0.8	0.5	0.09	0.18	0.22
84958	SYTL1	mRNA	0.45	0.48	0.3	0.03	0.09	0.08
3206	HOXA10	mRNA	1.03	1.18	0.86	0.49	0.48	0.54
4608	MYBPH	mRNA	2.18	2.47	1.85	0.85	0.82	0.8
1850	DUSP8	mRNA	1.06	1.19	0.93	0.49	0.57	0.53
136227	COL26A1	mRNA	0.85	0.92	0.71	0.19	0.2	0.12
7450	VWF	mRNA	1.28	1.38	1.14	0.7	0.73	0.62
64285	RHBDF1	mRNA	2.64	2.69	2.29	1.34	1.54	1.37
79154	DHRS11	mRNA	6.43	6.79	5.57	3.01	3.5	2.82
8496	PPFIBP1	mRNA	4.87	4.95	4.41	2.87	3.14	2.7
4319	MMP10	mRNA	1.39	1.62	0.91	0.39	0.37	0.17
7552	ZNF711	mRNA	0.22	0.25	0.16	0.07	0.06	0.06
2983	GUCY1B1	mRNA	0.85	0.91	0.6	0.29	0.25	0.24
51460	SFMBT1	mRNA	2.21	2.42	1.89	1.55	1.27	1.08
55586	MIOX	mRNA	0.21	0.3	0.16	0.07	0.09	0.0
83445	GSG1	mRNA	1.7	1.95	1.49	0.96	1.01	0.71
9541	CIR1	mRNA	20.24	23.12	19.53	13.73	14.39	11.73
339390	CLEC4G	mRNA	0.56	0.75	0.54	0.19	0.23	0.11
5608	MAP2K6	mRNA	0.52	0.87	0.51	0.17	0.26	0.2
375057	STUM	mRNA	0.11	0.23	0.13	0.02	0.03	0.03
80071	CCDC15	mRNA	1.06	1.48	1.09	0.75	0.72	0.74
284467	FAM19A3	mRNA	0.26	0.88	0.56	0.08	0.04	0.05
10734	STAG3	mRNA	1.13	1.66	1.33	0.93	1.01	0.77
84662	GLIS2	mRNA	0.58	1.01	0.75	0.41	0.41	0.3
3624	INHBA	mRNA	0.41	0.54	0.49	0.12	0.21	0.11
283208	P4HA3	mRNA	0.36	0.47	0.46	0.15	0.19	0.11
4729	NDUFV2	mRNA	190.53	221.63	219.72	127.34	148.82	124.98
911	CD1C	mRNA	11.53	14.36	14.45	5.88	6.32	5.27
10200	MPHOSPH6	mRNA	34.9	40.41	39.79	20.49	22.75	20.82
1622	DBI	mRNA	572.81	662.47	652.16	370.69	404.72	382.84
770	CA11	mRNA	1.92	2.28	2.32	1.07	1.37	1.17
51704	GPRC5B	mRNA	0.27	0.39	0.38	0.06	0.12	0.07
55959	SULF2	mRNA	1.07	1.31	1.26	0.68	0.79	0.72
9618	TRAF4	mRNA	3.45	4.12	3.85	2.33	2.49	2.08
3758	KCNJ1	mRNA	0.88	1.2	1.03	0.31	0.29	0.14
85358	SHANK3	mRNA	0.37	0.49	0.44	0.18	0.17	0.13
255758	TCTEX1D2	mRNA	4.13	6.73	5.79	2.22	2.13	1.91
116028	RMI2	mRNA	1.91	2.84	2.44	1.18	1.27	1.23
3084	NRG1	mRNA	1.83	3.02	2.19	0.31	0.38	0.35
874	CBR3	mRNA	2.49	3.73	3.01	1.19	0.95	1.09
134429	STARD4	mRNA	37.41	45.36	40.95	25.08	24.33	25.31
23255	MTCL1	mRNA	0.39	0.63	0.46	0.16	0.24	0.17
285313	IGSF10	mRNA	0.31	0.44	0.31	0.15	0.2	0.14
4938	OAS1	mRNA	12.16	15.37	12.51	7.45	9.6	7.14
55024	BANK1	mRNA	0.61	0.7	0.67	0.24	0.36	0.28
90993	CREB3L1	mRNA	0.42	0.48	0.41	0.08	0.18	0.09
9760	TOX	mRNA	0.48	0.6	0.5	0.07	0.18	0.06
131405	TRIM71	mRNA	0.03	0.04	0.03	0.0	0.01	0.0
10382	TUBB4A	mRNA	1.86	2.1	1.83	1.08	1.2	0.92
9145	SYNGR1	mRNA	3.48	3.84	3.51	2.1	2.15	1.81
10125	RASGRP1	mRNA	0.53	0.65	0.52	0.2	0.29	0.11
8835	SOCS2	mRNA	4.29	5.93	4.87	1.78	2.3	1.18
29893	PSMC3IP	mRNA	2.56	3.41	2.6	1.31	1.49	1.58
55733	HHAT	mRNA	1.86	2.39	1.96	1.17	1.15	1.39
64151	NCAPG	mRNA	7.6	9.5	8.09	4.36	4.49	5.24
81624	DIAPH3	mRNA	2.01	2.77	2.3	1.07	1.1	1.31
79929	MAP6D1	mRNA	1.36	1.79	1.46	0.67	0.93	0.96
144455	E2F7	mRNA	1.06	1.43	1.19	0.54	0.65	0.77
9319	TRIP13	mRNA	6.33	8.3	7.18	3.17	3.71	5.04
3835	KIF22	mRNA	11.7	14.67	13.2	7.0	7.65	9.18
9934	P2RY14	mRNA	0.36	0.41	0.32	0.07	0.08	0.17
2633	GBP1	mRNA	3.05	3.35	2.79	1.67	1.75	1.93
1837	DTNA	mRNA	3.87	4.08	3.52	2.18	2.14	2.43
23621	BACE1	mRNA	10.93	11.72	10.33	6.99	6.84	7.18
3675	ITGA3	mRNA	1.42	1.67	1.36	0.62	0.59	0.69
2135	EXTL2	mRNA	4.0	4.47	3.9	2.25	2.04	2.33
83449	PMFBP1	mRNA	2.75	3.34	2.71	1.72	1.57	1.8
995	CDC25C	mRNA	1.82	2.29	1.89	0.92	0.82	1.06
894	CCND2	mRNA	1.34	1.76	1.32	0.44	0.4	0.56
3952	LEP	mRNA	1.05	1.37	1.07	0.4	0.36	0.5
3762	KCNJ5	mRNA	6.56	8.32	6.61	2.74	1.48	2.75
5255	PHKA1	mRNA	0.65	0.75	0.6	0.35	0.26	0.35
55388	MCM10	mRNA	2.93	3.62	3.15	1.9	1.53	2.09
238	ALK	mRNA	4.14	5.18	4.24	2.46	1.95	2.87
4288	MKI67	mRNA	17.67	20.26	17.06	10.71	9.38	11.88
93432	MGAM2	mRNA	0.13	0.16	0.13	0.04	0.02	0.06
78995	C17orf53	mRNA	2.36	2.9	2.25	1.6	1.45	1.86
993	CDC25A	mRNA	3.25	3.69	2.96	1.93	1.87	2.44
5557	PRIM1	mRNA	5.93	8.21	7.8	5.23	4.19	4.28
641371	ACOT1	mRNA	3.01	4.81	4.24	2.25	1.89	1.88
84303	CHCHD6	mRNA	4.21	6.27	5.87	3.31	2.86	2.98
80150	ASRGL1	mRNA	12.84	16.94	15.51	11.55	7.81	10.13
2177	FANCD2	mRNA	3.07	3.79	3.45	2.38	2.02	2.26
10964	IFI44L	mRNA	0.48	0.77	0.66	0.28	0.19	0.23
10878	CFHR3	mRNA	0.42	0.94	0.69	0.19	0.05	0.1
1996	ELAVL4	mRNA	1.04	1.63	1.23	0.78	0.5	0.67
26150	RIBC2	mRNA	0.48	0.89	0.63	0.28	0.14	0.24
29057	FAM156A	mRNA	2.86	4.11	3.14	2.25	1.28	1.33
80328	ULBP2	mRNA	1.38	1.72	1.41	0.96	0.58	0.57
151	ADRA2B	mRNA	0.81	0.93	0.71	0.39	0.29	0.2
83694	RPS6KL1	mRNA	2.04	2.24	1.92	1.41	1.25	1.2
203286	ANKS6	mRNA	0.47	0.5	0.44	0.27	0.21	0.21
23362	PSD3	mRNA	1.55	1.63	1.51	1.08	0.94	0.9
3216	HOXB6	mRNA	2.53	2.73	2.43	1.51	1.21	1.02
641700	ECSCR	mRNA	0.28	0.41	0.26	0.05	0.0	0.0
23457	ABCB9	mRNA	2.05	2.49	1.84	1.08	0.78	0.81
7442	TRPV1	mRNA	1.57	1.93	1.57	1.0	0.96	0.86
3269	HRH1	mRNA	3.88	4.53	3.81	2.38	2.26	2.24
255057	CBARP	mRNA	1.7	2.05	1.61	0.86	0.89	0.79
10763	NES	mRNA	3.43	4.69	3.33	1.11	1.09	0.84
5427	POLE2	mRNA	3.86	4.62	4.08	2.35	2.24	2.09
2308	FOXO1	mRNA	1.06	1.23	1.02	0.52	0.47	0.41
25894	PLEKHG4	mRNA	0.84	1.01	0.81	0.44	0.39	0.32
8317	CDC7	mRNA	2.42	2.36	2.27	1.3	1.19	1.62
7067	THRA	mRNA	7.67	7.31	6.99	4.58	4.37	5.46
163786	SASS6	mRNA	2.29	2.03	2.07	1.24	1.19	1.74
5017	OVOL1	mRNA	0.25	0.19	0.22	0.05	0.02	0.11
149628	PYHIN1	mRNA	2.88	2.57	2.75	1.46	1.0	2.0
3784	KCNQ1	mRNA	4.6	4.09	3.98	2.12	2.58	3.04
1675	CFD	mRNA	10.16	9.5	9.1	4.53	5.31	6.61
84327	ZBED3	mRNA	5.12	4.55	3.85	2.39	2.74	3.52
445347	TARP	mRNA	1.58	1.02	0.95	0.12	0.34	0.51
126382	NR2C2AP	mRNA	6.66	6.22	6.97	3.28	4.63	4.78
200916	RPL22L1	mRNA	8.14	8.21	9.84	4.41	6.51	5.34
374403	TBC1D10C	mRNA	5.64	5.02	6.22	2.69	4.07	3.43
100129480	MKRN2OS	mRNA	0.96	0.98	0.81	0.15	0.53	0.43
23764	MAFF	mRNA	10.57	9.0	9.14	5.52	6.54	5.66
29094	LGALSL	mRNA	0.83	0.7	0.75	0.37	0.51	0.41
387103	CENPW	mRNA	5.98	5.51	5.51	2.37	2.85	3.19
25886	POC1A	mRNA	5.04	4.44	4.63	2.23	2.58	2.67
7098	TLR3	mRNA	1.0	0.91	0.93	0.34	0.55	0.47
57192	MCOLN1	mRNA	98.64	91.19	94.17	59.81	66.77	62.56
201161	CENPV	mRNA	1.19	0.93	1.11	0.23	0.39	0.3
643834	PGA3	mRNA	32.67	27.15	32.23	17.68	19.36	22.08
151835	CPNE9	mRNA	1.07	0.85	1.13	0.41	0.48	0.49
91689	SMDT1	mRNA	21.61	18.07	22.24	12.24	13.34	14.06
199953	TMEM201	mRNA	5.29	4.88	5.07	3.51	2.97	3.56
10420	TESK2	mRNA	6.76	6.19	6.59	3.72	2.84	3.72
9134	CCNE2	mRNA	8.35	7.45	8.31	4.22	3.98	5.27
7301	TYRO3	mRNA	2.43	2.11	2.25	1.27	1.15	1.42
2274	FHL2	mRNA	0.51	0.39	0.49	0.03	0.0	0.1
246330	PELI3	mRNA	5.32	4.43	4.94	2.68	2.38	2.63
55342	STRBP	mRNA	5.46	4.67	5.25	3.17	2.93	2.98
10417	SPON2	mRNA	5.18	4.17	4.77	1.91	1.75	1.67
145773	FAM81A	mRNA	1.33	0.95	1.29	0.26	0.2	0.16
9253	NUMBL	mRNA	3.34	2.75	3.2	1.9	1.86	1.93
10079	ATP9A	mRNA	1.59	1.36	1.66	0.87	0.65	0.83
7161	TP73	mRNA	0.18	0.12	0.19	0.03	0.02	0.04
22837	COBLL1	mRNA	0.29	0.22	0.29	0.12	0.09	0.11
5909	RAP1GAP	mRNA	0.43	0.47	0.46	0.22	0.11	0.09
171558	PTCRA	mRNA	12.65	12.42	13.03	6.15	4.29	5.12
9132	KCNQ4	mRNA	0.2	0.2	0.22	0.06	0.0	0.03
5151	PDE8A	mRNA	11.35	11.86	11.93	7.83	7.05	7.09
1958	EGR1	mRNA	7.7	8.95	8.68	3.12	2.3	2.42
5921	RASA1	mRNA	24.87	27.08	26.6	18.59	16.51	16.83
9653	HS2ST1	mRNA	19.37	20.99	21.95	13.48	10.77	10.92
157506	RDH10	mRNA	2.82	3.04	3.12	2.13	1.89	1.95
9828	ARHGEF17	mRNA	1.17	1.3	1.32	0.71	0.58	0.62
80321	CEP70	mRNA	1.51	1.58	1.75	0.83	0.76	0.65
5243	ABCB1	mRNA	1.22	1.19	1.3	0.65	0.51	0.42
8482	SEMA7A	mRNA	16.0	15.45	16.15	9.41	8.08	6.98
958	CD40	mRNA	49.12	46.33	50.83	30.25	28.83	26.47
3113	HLA-DPA1	mRNA	230.76	217.65	243.73	150.44	147.54	129.39
3398	ID2	mRNA	121.78	111.98	127.36	73.93	71.23	61.75
7136	TNNI2	mRNA	5.62	6.14	6.0	3.01	3.14	2.16
3122	HLA-DRA	mRNA	779.98	818.49	823.33	497.64	520.85	431.44
3123	HLA-DRB1	mRNA	469.53	494.71	487.36	288.59	303.9	260.02
51477	ISYNA1	mRNA	5.34	5.81	5.94	2.98	2.79	2.51
57045	TWSG1	mRNA	26.24	27.79	28.66	17.54	17.26	15.78
340205	TREML1	mRNA	3.86	4.29	4.24	1.93	1.65	1.39
3127	HLA-DRB5	mRNA	67.24	75.39	73.48	40.7	38.98	35.22
8869	ST3GAL5	mRNA	25.56	27.65	27.49	17.93	17.28	15.96
3126	HLA-DRB4	mRNA	108.65	111.34	110.67	63.98	56.5	51.49
84803	GPAT3	mRNA	17.25	17.13	17.75	8.2	7.2	5.7
3125	HLA-DRB3	mRNA	87.65	92.72	90.95	51.45	49.41	42.02
10398	MYL9	mRNA	7.72	8.02	8.11	3.58	3.21	1.98
1795	DOCK3	mRNA	1.96	2.06	2.09	0.84	0.81	0.55
85439	STON2	mRNA	3.33	3.36	3.38	2.14	2.1	1.83
3248	HPGD	mRNA	5.58	6.21	5.89	3.54	3.26	2.68
2273	FHL1	mRNA	2.81	3.07	2.76	1.36	1.12	0.87
3556	IL1RAP	mRNA	9.06	9.46	9.02	6.12	5.83	5.32
7915	ALDH5A1	mRNA	2.47	2.31	2.39	0.68	0.85	0.69
1757	SARDH	mRNA	2.58	2.48	2.69	0.28	0.29	0.25
3958	LGALS3	mRNA	530.92	502.47	520.28	293.0	295.31	299.43
2170	FABP3	mRNA	118.37	111.96	118.93	28.99	28.24	30.95
8777	MPDZ	mRNA	0.64	0.55	0.62	0.19	0.22	0.23
9518	GDF15	mRNA	48.07	42.54	46.28	15.72	16.31	19.23
6242	RTKN	mRNA	1.23	1.12	1.22	0.52	0.53	0.58
81617	CAB39L	mRNA	7.47	7.06	7.14	3.35	3.54	3.89
2766	GMPR	mRNA	3.89	3.62	3.85	1.38	1.58	1.81
23316	CUX2	mRNA	0.53	0.48	0.55	0.16	0.14	0.14
3988	LIPA	mRNA	1310.82	1229.48	1347.98	613.18	520.59	564.31
387509	GPR153	mRNA	1.7	1.61	1.74	0.64	0.53	0.53
84541	KBTBD8	mRNA	11.68	10.7	11.32	6.94	6.44	6.63
54209	TREM2	mRNA	369.78	338.63	361.08	167.52	156.08	159.15
5468	PPARG	mRNA	19.2	18.18	18.81	10.34	9.84	10.27
2990	GUSB	mRNA	98.81	92.8	95.0	52.97	49.66	50.66
2139	EYA2	mRNA	0.58	0.46	0.6	0.08	0.07	0.12
7345	UCHL1	mRNA	10.7	9.08	10.7	3.19	3.08	3.32
26503	SLC17A5	mRNA	25.62	24.69	27.08	16.55	15.24	16.02
4063	LY9	mRNA	2.3	2.18	2.42	0.67	0.46	0.71
4775	NFATC3	mRNA	15.01	15.22	14.96	8.74	8.23	7.87
4023	LPL	mRNA	51.59	54.29	52.31	13.32	11.53	8.48
154141	MBOAT1	mRNA	18.03	18.84	18.93	10.95	10.28	9.73
200933	FBXO45	mRNA	5.44	5.53	5.55	3.68	3.52	3.44
79695	GALNT12	mRNA	6.52	6.51	6.8	2.0	1.39	1.27
34	ACADM	mRNA	25.5	25.35	26.28	16.06	14.88	15.0
5627	PROS1	mRNA	13.22	13.44	14.01	8.07	7.2	6.72
928	CD9	mRNA	234.16	233.11	247.33	155.47	141.38	138.21
353189	SLCO4C1	mRNA	1.42	1.39	1.39	0.2	0.24	0.22
5214	PFKP	mRNA	48.98	49.31	49.24	32.45	32.64	32.33
944	TNFSF8	mRNA	4.83	4.9	4.95	1.37	1.25	1.33
28984	RGCC	mRNA	195.08	195.74	195.66	65.89	61.3	64.83
27123	DKK2	mRNA	4.02	4.13	4.05	0.88	0.86	0.68
4739	NEDD9	mRNA	8.7	8.91	8.54	1.15	1.05	0.98
84617	TUBB6	mRNA	87.25	88.28	86.71	57.77	57.47	56.48
54329	GPR85	mRNA	9.56	9.69	9.77	4.32	4.49	4.8
5023	P2RX1	mRNA	12.68	13.16	13.19	4.75	4.71	5.35
5341	PLEK	mRNA	182.87	190.23	187.42	110.59	108.95	112.59
170371	TMEM273	mRNA	43.53	46.19	45.36	25.73	26.84	26.67
4900	NRGN	mRNA	25.26	28.09	26.52	6.24	6.83	7.48
27306	HPGDS	mRNA	93.99	94.37	105.69	17.66	12.7	18.27
54968	TMEM70	mRNA	22.01	22.28	23.32	14.7	14.41	15.23
127495	LRRC39	mRNA	3.47	3.57	3.92	0.6	0.52	0.87
3428	IFI16	mRNA	138.55	145.64	149.24	96.93	94.35	96.21
9270	ITGB1BP1	mRNA	60.0	62.95	64.69	30.22	28.11	27.86
6335	SCN9A	mRNA	1.48	1.6	1.62	0.36	0.29	0.32
6921	ELOC	mRNA	43.91	45.95	47.79	24.22	25.44	24.12
2171	FABP5	mRNA	444.12	452.72	468.1	260.68	264.96	269.94
9023	CH25H	mRNA	15.48	15.82	16.6	0.86	1.37	0.59
126731	CCSAP	mRNA	18.18	18.89	19.18	7.24	7.18	7.02
25874	MPC2	mRNA	68.36	67.84	73.27	36.42	35.53	33.76
10217	CTDSPL	mRNA	4.64	4.45	5.07	1.38	1.57	1.5
285973	ATG9B	mRNA	0.67	0.63	0.72	0.18	0.19	0.18
2644	GCHFR	mRNA	18.19	16.5	18.89	11.57	12.41	10.76
54020	SLC37A1	mRNA	8.75	7.81	9.27	4.58	4.97	4.6
9455	HOMER2	mRNA	3.14	2.96	3.26	1.25	1.73	1.31
10124	ARL4A	mRNA	3.05	2.95	3.14	1.8	2.05	1.75
9560	CCL4L2	mRNA	91.69	82.98	92.57	38.56	44.95	34.39
597	BCL2A1	mRNA	143.1	137.66	146.51	74.87	82.38	67.93
6357	CCL13	mRNA	1487.31	1409.43	1568.01	340.72	435.59	264.29
122970	ACOT4	mRNA	3.47	3.04	3.48	1.05	1.26	1.07
22801	ITGA11	mRNA	1.06	0.92	1.06	0.45	0.53	0.47
2952	GSTT1	mRNA	5.17	4.77	5.25	3.14	3.44	3.15
8727	CTNNAL1	mRNA	6.28	6.02	6.64	2.26	2.86	2.71
3384	ICAM2	mRNA	4.99	4.79	5.03	3.07	3.43	3.22
54836	BSPRY	mRNA	0.33	0.29	0.34	0.06	0.11	0.09
913	CD1E	mRNA	5.04	4.96	4.98	1.75	2.21	1.61
84879	MFSD2A	mRNA	13.47	13.49	12.96	7.89	8.58	7.66
388341	LRRC75A	mRNA	0.78	0.78	0.74	0.19	0.23	0.15
65997	RASL11B	mRNA	6.04	6.15	5.74	1.25	1.11	0.88
8536	CAMK1	mRNA	180.28	177.33	170.44	81.58	76.88	71.78
58529	MYOZ1	mRNA	5.53	5.63	5.35	1.44	1.38	0.88
105369230	105369230	mRNA	29.67	29.48	28.79	18.92	18.01	17.13
26119	LDLRAP1	mRNA	14.36	13.97	13.73	8.67	8.97	8.15
4332	MNDA	mRNA	87.94	85.48	82.83	51.97	52.29	48.67
120224	TMEM45B	mRNA	13.59	13.3	12.78	6.13	6.21	5.21
3557	IL1RN	mRNA	181.72	173.05	163.99	46.27	46.16	28.71
58511	DNASE2B	mRNA	2.66	2.54	2.59	0.35	0.4	0.14
51466	EVL	mRNA	96.48	94.65	94.56	37.81	36.67	30.88
4145	MATK	mRNA	65.98	61.52	61.12	19.35	19.11	15.61
25907	TMEM158	mRNA	29.81	28.82	28.38	14.01	14.06	13.63
23308	ICOSLG	mRNA	15.54	13.94	13.66	6.69	7.83	5.89
8651	SOCS1	mRNA	3.11	2.8	2.78	0.84	1.19	0.64
1844	DUSP2	mRNA	9.67	9.25	8.6	3.95	4.59	3.82
150763	GPAT2	mRNA	2.97	2.85	2.61	1.35	1.59	1.23
2203	FBP1	mRNA	154.4	137.61	128.89	51.12	50.61	26.82
81501	DCSTAMP	mRNA	56.75	50.93	49.22	20.92	18.71	10.38
6693	SPN	mRNA	51.74	47.55	46.26	24.28	22.28	16.71
7078	TIMP3	mRNA	44.77	38.25	37.97	11.99	10.43	5.94
2321	FLT1	mRNA	26.56	23.05	22.82	9.13	7.87	5.08
3554	IL1R1	mRNA	2.37	2.2	2.1	1.2	1.09	0.94
1959	EGR2	mRNA	57.13	51.16	49.62	19.4	16.72	11.12
3684	ITGAM	mRNA	113.46	108.57	106.44	73.66	71.41	64.84
4665	NAB2	mRNA	19.29	18.76	18.4	10.18	10.02	8.38
5778	PTPN7	mRNA	38.03	36.92	36.22	21.12	20.95	17.81
1839	HBEGF	mRNA	23.74	23.63	22.56	11.24	10.68	7.32
6509	SLC1A4	mRNA	35.1	34.67	33.18	20.44	19.0	16.59
79817	MOB3B	mRNA	8.87	8.22	8.27	3.3	3.54	2.19
1043	CD52	mRNA	313.41	290.91	295.03	123.63	134.83	87.59
11000	SLC27A3	mRNA	15.4	15.05	14.1	5.68	6.36	4.19
59	ACTA2	mRNA	2.58	2.5	2.35	1.43	1.51	1.21
1847	DUSP5	mRNA	12.7	12.19	11.49	5.43	5.59	3.66
9466	IL27RA	mRNA	7.49	6.89	7.05	3.85	4.27	3.78
10908	PNPLA6	mRNA	98.67	91.26	93.24	63.67	65.16	60.29
90853	SPOCD1	mRNA	8.42	7.62	7.89	2.78	2.93	2.33
80270	HSD3B7	mRNA	55.65	47.77	53.47	22.48	22.88	19.24
5547	PRCP	mRNA	78.86	75.24	79.37	46.41	46.66	44.48
9308	CD83	mRNA	82.44	75.92	83.53	29.51	27.76	23.02
760	CA2	mRNA	69.06	63.31	69.89	24.06	22.51	19.62
4481	MSR1	mRNA	318.84	297.64	315.3	222.34	205.19	192.3
333929	SNAI3	mRNA	6.22	5.43	5.74	3.07	2.86	2.35
404037	HAPLN4	mRNA	5.83	5.26	5.43	2.67	2.44	1.79
6272	SORT1	mRNA	37.82	35.2	36.49	23.92	23.13	19.66
56034	PDGFC	mRNA	15.85	15.43	15.62	9.71	9.26	8.69
338382	RAB7B	mRNA	60.11	56.02	56.41	27.88	26.09	22.02
467	ATF3	mRNA	20.41	19.31	19.51	7.16	6.19	4.18
2936	GSR	mRNA	101.55	97.35	98.84	65.79	63.63	57.69
56670	SUCNR1	mRNA	62.27	57.51	59.66	36.58	34.29	33.41
132864	CPEB2	mRNA	9.9	9.14	9.47	5.96	5.5	5.16
6764	ST5	mRNA	6.63	5.91	5.99	3.28	2.83	2.65
3655	ITGA6	mRNA	15.3	13.92	13.45	5.52	4.43	3.7
84444	DOT1L	mRNA	19.7	19.33	17.74	11.1	10.23	10.37
84890	ADO	mRNA	24.43	23.17	22.13	13.52	13.22	13.13
219833	C11orf45	mRNA	18.69	17.64	16.67	8.14	7.47	7.84
128506	OCSTAMP	mRNA	31.16	29.15	26.61	5.78	5.07	3.13
2152	F3	mRNA	9.33	8.99	7.75	2.73	2.36	1.62
10783	NEK6	mRNA	96.54	90.66	86.5	63.27	59.23	57.39
10238	DCAF7	mRNA	43.95	41.19	39.68	28.88	26.46	25.81
9099	USP2	mRNA	12.43	11.7	10.72	4.26	3.13	2.97
121512	FGD4	mRNA	10.5	10.08	9.54	6.86	6.21	6.19
8871	SYNJ2	mRNA	1.44	1.33	1.21	0.62	0.51	0.49
256472	TMEM151A	mRNA	0.46	0.39	0.37	0.09	0.12	0.11
6510	SLC1A5	mRNA	53.92	51.48	50.35	30.78	30.77	30.2
976	ADGRE5	mRNA	49.51	46.6	46.74	27.74	28.26	28.38
8995	TNFSF18	mRNA	2.78	2.36	2.4	0.12	0.07	0.07
1435	CSF1	mRNA	529.96	445.36	440.4	56.53	52.8	30.16
7464	CORO2A	mRNA	3.37	3.01	2.91	1.26	1.28	1.25
3315	HSPB1	mRNA	152.58	141.29	135.19	77.4	76.94	77.34
10865	ARID5A	mRNA	36.11	35.21	34.48	23.13	23.33	24.15
1497	CTNS	mRNA	47.46	44.96	43.97	29.15	29.71	30.63
401647	GOLGA7B	mRNA	3.26	3.17	2.76	1.13	1.13	1.1
57731	SPTBN4	mRNA	0.49	0.45	0.4	0.13	0.13	0.13
100129836	COL4A2-AS2	mRNA	1.82	1.78	1.53	0.14	0.23	0.16
1960	EGR3	mRNA	0.53	0.51	0.46	0.16	0.18	0.19
6915	TBXA2R	mRNA	4.14	4.0	3.45	1.08	1.46	1.47
84281	C2orf88	mRNA	0.45	0.43	0.33	0.07	0.09	0.12
222962	SLC29A4	mRNA	0.36	0.34	0.29	0.09	0.05	0.1
10493	VAT1	mRNA	232.08	212.55	206.53	144.96	135.2	149.04
55247	NEIL3	mRNA	2.1	1.94	1.87	0.98	0.8	0.93
1050	CEBPA	mRNA	38.46	35.33	34.29	19.53	16.36	19.07
65078	RTN4R	mRNA	13.24	11.65	10.76	4.01	3.43	4.19
9214	FCMR	mRNA	19.3	16.66	15.97	5.65	4.6	5.09
3707	ITPKB	mRNA	11.48	10.3	9.75	4.35	3.96	4.14
57181	SLC39A10	mRNA	4.19	4.19	3.87	1.86	1.57	1.53
134265	AFAP1L1	mRNA	3.59	3.62	3.27	0.63	0.46	0.42
116211	TM4SF19	mRNA	262.47	258.18	238.83	107.55	95.12	94.43
3983	ABLIM1	mRNA	1.41	1.5	1.29	0.38	0.22	0.3
54757	FAM20A	mRNA	13.61	13.86	12.97	8.77	8.44	8.54
5027	P2RX7	mRNA	13.25	13.69	12.89	8.19	6.93	7.71
57493	HEG1	mRNA	8.87	8.68	8.2	5.12	4.45	4.73
10253	SPRY2	mRNA	13.51	13.27	12.46	8.05	6.74	7.48
9258	MFHAS1	mRNA	16.88	16.19	16.12	8.93	7.9	9.0
10873	ME3	mRNA	4.2	3.83	3.91	1.28	0.95	1.38
10966	RAB40B	mRNA	2.09	2.15	2.13	1.14	1.01	1.13
2012	EMP1	mRNA	302.1	293.13	298.94	150.1	138.61	148.85
644150	WIPF3	mRNA	0.94	0.94	0.92	0.25	0.2	0.26
9956	HS3ST2	mRNA	90.15	87.17	87.51	30.19	25.2	33.22
1063	CENPF	mRNA	4.2	4.66	4.37	2.26	1.88	2.57
580	BARD1	mRNA	2.81	3.16	2.99	1.74	1.59	1.92
9781	RNF144A	mRNA	0.78	0.88	0.8	0.49	0.45	0.51
148823	GCSAML	mRNA	0.42	0.49	0.43	0.15	0.08	0.15
79901	CYBRD1	mRNA	22.16	24.46	23.47	14.53	13.47	15.03
130589	GALM	mRNA	28.85	32.39	30.5	17.63	16.53	18.64
2059	EPS8	mRNA	13.7	15.53	14.9	7.53	6.25	7.54
57194	ATP10A	mRNA	3.86	4.53	4.43	1.73	1.46	1.83
9966	TNFSF15	mRNA	5.5	6.2	5.81	1.84	1.88	2.21
93010	B3GNT7	mRNA	25.57	27.04	26.42	14.97	14.62	16.21
66004	LYNX1	mRNA	1.92	2.21	2.08	0.92	0.94	1.09
84532	ACSS1	mRNA	16.67	18.76	17.33	7.94	7.86	9.02
5274	SERPINI1	mRNA	10.49	12.59	11.24	3.05	2.78	3.8
79172	CENPO	mRNA	5.23	5.25	5.33	3.24	3.07	3.52
401541	CENPP	mRNA	4.07	4.04	4.22	2.05	1.86	2.35
4064	CD180	mRNA	72.08	74.7	72.3	42.04	35.61	45.73
83660	TLN2	mRNA	0.76	0.76	0.76	0.42	0.35	0.45
1840	DTX1	mRNA	4.2	4.42	4.0	1.97	1.63	2.42
9582	APOBEC3B	mRNA	2.78	2.97	2.69	0.73	0.84	1.12
122416	ANKRD9	mRNA	6.55	6.74	6.39	3.84	3.81	4.21
55540	IL17RB	mRNA	0.68	0.74	0.67	0.3	0.28	0.36
150771	ITPRIPL1	mRNA	3.8	4.02	3.71	2.2	2.21	2.41
137835	TMEM71	mRNA	4.68	5.07	4.52	1.9	1.79	2.16
170463	SSBP4	mRNA	48.86	48.11	47.29	28.85	28.28	32.14
10219	KLRG1	mRNA	2.39	2.5	2.4	1.41	1.36	1.61
1441	CSF3R	mRNA	15.46	15.81	15.62	9.24	9.52	10.82
57507	ZNF608	mRNA	0.38	0.42	0.36	0.08	0.11	0.12
23397	NCAPH	mRNA	14.95	15.36	14.34	4.69	5.46	5.99
401494	HACD4	mRNA	10.86	11.11	10.49	5.55	6.26	6.19
84433	CARD11	mRNA	2.74	3.03	2.81	1.29	1.51	1.4
4940	OAS3	mRNA	7.84	8.63	7.8	4.86	5.17	5.29
51316	PLAC8	mRNA	3.73	4.0	3.7	2.35	2.54	2.63
9315	NREP	mRNA	28.11	29.9	27.95	10.8	10.94	9.92
23022	PALLD	mRNA	3.91	4.46	4.05	0.77	0.8	0.68
2260	FGFR1	mRNA	14.93	16.22	14.86	7.14	7.01	6.58
9734	HDAC9	mRNA	2.29	2.39	2.2	1.18	1.22	1.09
2208	FCER2	mRNA	15.87	16.79	15.19	1.55	1.81	1.61
1462	VCAN	mRNA	32.29	34.03	30.26	8.11	7.77	7.22
166614	DCLK2	mRNA	2.47	2.76	2.58	0.71	0.86	0.6
6346	CCL1	mRNA	19.75	22.91	21.11	5.76	7.05	4.13
100287482	SMKR1	mRNA	0.71	0.87	0.79	0.05	0.11	0.0
28951	TRIB2	mRNA	3.43	3.88	3.43	1.67	1.56	1.54
5152	PDE9A	mRNA	1.4	1.76	1.6	0.18	0.1	0.05
3516	RBPJ	mRNA	46.94	51.52	49.05	23.61	22.4	20.63
1803	DPP4	mRNA	13.58	15.84	14.81	3.27	3.32	2.28
22891	ZNF365	mRNA	1.33	1.52	1.57	0.6	0.53	0.55
132720	FAM241A	mRNA	7.02	8.23	8.48	2.64	2.58	2.37
288	ANK3	mRNA	0.31	0.38	0.39	0.03	0.04	0.04
55243	KIRREL1	mRNA	0.56	0.65	0.73	0.02	0.03	0.02
55352	COPRS	mRNA	36.89	40.05	41.91	23.69	24.22	24.64
80832	APOL4	mRNA	26.4	30.6	29.73	5.43	5.88	4.38
5168	ENPP2	mRNA	86.08	97.7	96.84	31.2	30.63	29.83
10993	SDS	mRNA	2.77	3.08	2.98	1.61	1.61	1.65
6810	STX4	mRNA	68.02	72.24	72.0	46.0	45.76	46.57
216	ALDH1A1	mRNA	21.56	25.22	24.95	2.85	2.83	3.84
55353	LAPTM4B	mRNA	36.81	40.59	40.82	22.32	24.53	23.5
10170	DHRS9	mRNA	4.94	6.34	5.85	0.51	1.05	0.62
5154	PDGFA	mRNA	4.79	5.61	4.94	2.58	2.67	2.67
3075	CFH	mRNA	8.35	11.24	9.32	1.92	2.62	2.2
84918	LRP11	mRNA	3.37	3.82	3.54	2.17	2.3	2.22
220042	DDIAS	mRNA	3.04	3.72	3.32	1.22	1.33	1.48
4522	MTHFD1	mRNA	33.64	36.5	34.43	22.61	23.09	23.69
56253	CRTAM	mRNA	3.01	3.41	3.04	1.62	1.66	1.75
4088	SMAD3	mRNA	1.37	1.83	1.61	0.23	0.17	0.4
259266	ASPM	mRNA	2.63	3.19	2.91	1.37	1.26	1.61
4998	ORC1	mRNA	3.12	3.72	3.38	2.05	1.8	1.94
9585	KIF20B	mRNA	3.5	3.96	3.69	2.29	2.14	2.27
64805	P2RY12	mRNA	0.54	0.72	0.64	0.06	0.0	0.04
699	BUB1	mRNA	8.31	9.47	8.98	5.01	4.62	5.01
57494	RIMKLB	mRNA	1.44	2.18	2.02	1.93	1.97	3.43
57555	NLGN2	mRNA	0.13	0.21	0.16	0.35	0.23	0.42
2770	GNAI1	mRNA	0.54	0.95	0.49	1.28	0.96	1.75
4163	MCC	mRNA	0.52	0.67	0.66	0.85	0.73	1.03
2686	GGT7	mRNA	2.24	2.91	2.8	4.37	3.98	5.77
11278	KLF12	mRNA	0.04	0.08	0.1	0.16	0.15	0.36
286530	P2RY8	mRNA	2.33	3.84	3.21	4.32	4.07	7.0
205	AK4	mRNA	0.74	1.01	0.65	0.98	1.08	1.27
100527949	GIMAP1-GIMAP5	mRNA	8.3	9.89	9.37	10.88	13.5	16.17
28231	SLCO4A1	mRNA	7.57	8.16	7.26	8.9	10.25	11.48
79629	OCEL1	mRNA	8.56	9.62	8.48	10.88	12.63	13.46
4923	NTSR1	mRNA	0.51	0.77	0.46	0.96	1.26	1.54
1366	CLDN7	mRNA	2.41	3.77	3.11	3.88	4.87	4.94
6489	ST8SIA1	mRNA	0.04	0.1	0.08	0.12	0.19	0.21
230	ALDOC	mRNA	4.76	6.92	5.59	7.23	9.35	10.03
6940	ZNF354A	mRNA	1.92	2.54	2.17	2.66	3.35	3.5
642658	SCX	mRNA	1.4	2.05	1.77	2.06	2.29	2.65
57333	RCN3	mRNA	16.65	23.05	22.53	25.83	30.83	37.31
22898	DENND3	mRNA	13.42	17.74	16.15	19.64	21.18	24.88
10924	SMPDL3A	mRNA	3.43	5.32	4.56	5.64	6.58	7.78
81563	C1orf21	mRNA	1.76	2.19	2.06	2.72	2.51	3.07
94031	HTRA3	mRNA	2.92	3.44	3.06	4.28	3.99	4.7
143686	SESN3	mRNA	0.6	0.81	0.76	1.12	0.97	1.14
7903	ST8SIA4	mRNA	6.07	7.31	7.37	9.35	8.47	9.49
26579	MYEOV	mRNA	0.04	0.12	0.13	0.29	0.26	0.34
4293	MAP3K9	mRNA	0.21	0.27	0.29	0.4	0.38	0.45
4671	NAIP	mRNA	39.34	46.06	45.61	59.17	58.33	63.67
80183	RUBCNL	mRNA	3.2	4.53	4.72	6.73	6.82	7.65
64840	PORCN	mRNA	2.65	3.14	3.45	4.1	4.92	5.13
1015	CDH17	mRNA	0.16	0.23	0.26	0.35	0.47	0.45
56605	ERO1B	mRNA	2.35	2.85	3.04	3.24	3.69	3.75
3310	HSPA6	mRNA	16.87	24.11	23.43	27.85	32.02	32.36
5365	PLXNB3	mRNA	0.11	0.21	0.21	0.39	0.42	0.43
9262	STK17B	mRNA	5.15	6.43	5.95	7.56	7.98	8.0
57413	TMIGD3	mRNA	9.87	14.4	13.36	18.91	20.16	20.77
2550	GABBR1	mRNA	1.6	2.48	2.17	2.94	3.08	3.48
3718	JAK3	mRNA	2.84	4.05	3.93	5.76	6.55	7.58
1647	GADD45A	mRNA	1.73	2.91	2.48	3.83	4.44	5.12
162466	PHOSPHO1	mRNA	1.98	1.73	1.54	2.76	1.93	2.67
165215	FAM171B	mRNA	1.18	1.2	0.99	1.68	1.31	1.68
23322	RPGRIP1L	mRNA	0.8	0.83	0.96	1.27	1.01	1.16
84547	PGBD1	mRNA	1.4	1.54	1.74	2.33	1.95	2.24
9231	DLG5	mRNA	0.72	0.84	0.82	1.38	1.05	1.18
924	CD7	mRNA	0.04	0.1	0.08	0.33	0.2	0.25
23314	SATB2	mRNA	0.24	0.25	0.29	0.58	0.37	0.46
2074	ERCC6	mRNA	1.61	1.69	1.74	3.22	2.37	2.63
10207	PATJ	mRNA	0.55	0.54	0.53	0.95	0.73	0.8
100288142	NBPF20	mRNA	0.32	0.42	0.36	0.63	0.4	0.5
375686	SPATC1	mRNA	0.15	0.41	0.23	0.86	0.49	0.53
84525	HOPX	mRNA	0.0	0.38	0.08	0.86	0.53	0.55
169981	SPIN3	mRNA	0.52	0.81	0.63	1.09	0.85	1.03
64753	CCDC136	mRNA	0.36	0.5	0.33	0.79	0.58	0.73
51232	CRIM1	mRNA	1.63	1.57	1.79	6.19	5.38	3.91
10642	IGF2BP1	mRNA	2.52	2.41	2.57	4.23	3.97	3.4
4897	NRCAM	mRNA	0.24	0.19	0.32	1.29	1.22	0.8
1513	CTSK	mRNA	9.99	9.64	10.46	17.22	16.96	13.82
120892	LRRK2	mRNA	2.8	2.83	3.08	5.94	5.75	4.69
85479	DNAJC5B	mRNA	0.67	0.68	0.8	1.52	1.47	1.17
1438	CSF2RA	mRNA	24.99	24.33	28.97	38.87	37.97	32.23
113730	KLHDC7B	mRNA	0.05	0.07	0.09	0.26	0.25	0.15
5054	SERPINE1	mRNA	3.17	2.74	2.81	9.83	9.05	5.15
23043	TNIK	mRNA	6.59	5.73	5.91	10.38	9.75	7.73
3696	ITGB8	mRNA	1.91	1.68	1.71	4.73	4.34	2.9
4314	MMP3	mRNA	0.16	0.06	0.05	1.18	0.99	0.52
5166	PDK4	mRNA	0.71	0.32	0.57	1.46	1.35	0.86
1292	COL6A2	mRNA	104.24	88.96	91.46	166.4	162.96	121.34
58499	ZNF462	mRNA	0.68	0.55	0.61	1.07	1.07	0.77
330	BIRC3	mRNA	0.97	0.84	0.84	1.46	1.34	0.89
27074	LAMP3	mRNA	0.35	0.33	0.23	1.75	1.6	0.45
23657	SLC7A11	mRNA	12.56	10.43	10.04	28.26	24.71	13.84
26585	GREM1	mRNA	0.8	0.72	0.66	1.54	1.59	0.69
7421	VDR	mRNA	19.64	17.31	17.28	28.15	29.93	20.38
4317	MMP8	mRNA	6.04	5.16	5.24	8.03	8.52	5.64
84658	ADGRE3	mRNA	0.03	0.1	0.09	0.27	0.3	0.11
25805	BAMBI	mRNA	1.03	1.21	1.17	1.93	2.07	1.42
140706	CCM2L	mRNA	0.04	0.06	0.02	0.27	0.22	0.08
54602	NDFIP2	mRNA	1.71	1.8	1.68	2.73	2.62	1.94
84824	FCRLA	mRNA	0.42	0.49	0.34	1.21	1.15	0.59
3690	ITGB3	mRNA	2.66	2.33	2.28	10.53	10.32	5.6
1236	CCR7	mRNA	0.07	0.07	0.06	1.28	1.34	0.55
1646	AKR1C2	mRNA	0.05	0.07	0.02	0.32	0.36	0.15
6367	CCL22	mRNA	1.99	2.56	1.92	9.79	10.08	4.04
346389	MACC1	mRNA	0.83	0.86	0.83	1.66	1.45	1.15
5343	PLGLB1	mRNA	0.0	0.0	0.0	0.53	0.35	0.18
645191	LINGO3	mRNA	0.28	0.44	0.5	1.6	1.18	0.92
200132	TCTEX1D1	mRNA	3.71	3.93	4.24	6.62	6.0	5.05
80005	DOCK5	mRNA	5.55	6.17	5.69	8.71	8.0	6.96
26298	EHF	mRNA	0.0	0.01	0.0	0.09	0.07	0.03
285368	PRRT3	mRNA	0.45	0.57	0.51	1.34	1.16	0.94
1113	CHGA	mRNA	0.02	0.03	0.0	0.28	0.22	0.14
133746	JMY	mRNA	0.77	0.75	0.73	1.16	0.99	0.87
341152	OR2AT4	mRNA	0.62	0.6	0.46	1.57	1.03	0.87
3709	ITPR2	mRNA	18.84	18.93	18.04	27.87	23.93	23.15
3685	ITGAV	mRNA	12.55	12.21	12.92	19.31	16.82	15.84
50614	GALNT9	mRNA	0.0	0.0	0.0	0.15	0.09	0.06
7448	VTN	mRNA	0.68	0.78	0.8	2.43	1.8	1.52
6498	SKIL	mRNA	7.45	4.72	5.15	11.57	8.94	9.4
3096	HIVEP1	mRNA	3.71	2.96	3.11	5.6	4.54	4.99
284110	GSDMA	mRNA	6.61	5.49	5.59	9.5	7.81	8.1
102725180	LOC102725180	mRNA	0.86	0.32	0.56	1.56	1.42	1.24
113026	PLCD3	mRNA	1.05	0.79	0.79	1.34	1.27	1.18
26115	TANC2	mRNA	2.87	2.55	2.28	3.92	3.45	3.16
8714	ABCC3	mRNA	15.89	13.4	13.1	24.05	21.91	18.07
389072	PLEKHM3	mRNA	2.09	1.69	1.77	3.17	2.8	2.42
7779	SLC30A1	mRNA	27.52	23.55	23.54	42.29	35.38	33.05
134957	STXBP5	mRNA	5.73	4.95	5.28	8.79	7.74	7.22
2048	EPHB2	mRNA	2.03	1.33	1.53	3.64	3.06	2.83
100507050	TPBGL	mRNA	2.57	2.32	2.52	3.77	3.48	3.13
8437	RASAL1	mRNA	4.59	3.83	4.15	7.33	6.88	5.81
113146	AHNAK2	mRNA	9.01	7.37	7.1	18.89	16.49	13.84
162394	SLFN5	mRNA	6.86	6.46	6.02	12.55	11.26	10.1
23158	TBC1D9	mRNA	7.97	7.62	7.22	11.86	11.24	10.33
90249	UNC5A	mRNA	1.12	1.06	0.83	1.99	1.28	1.15
3772	KCNJ15	mRNA	2.0	2.43	1.64	2.94	2.63	2.64
2335	FN1	mRNA	0.41	0.55	0.32	0.88	0.66	0.55
100996763	NOTCH2NLB	mRNA	1.62	2.06	1.52	2.86	2.6	2.18
91156	IGFN1	mRNA	0.0	0.03	0.0	0.05	0.09	0.02
388650	FAM69A	mRNA	0.97	1.65	1.12	1.67	2.1	1.36
6447	SCG5	mRNA	1.03	0.76	1.01	1.73	2.88	0.97
6361	CCL17	mRNA	0.67	0.53	0.83	2.0	4.95	1.3
7022	TFAP2C	mRNA	0.67	0.79	0.97	1.36	1.63	1.19
55740	ENAH	mRNA	0.15	0.18	0.24	0.3	0.36	0.24
2625	GATA3	mRNA	0.29	0.38	0.41	0.74	1.16	0.55
3620	IDO1	mRNA	0.57	0.97	0.75	1.72	2.89	1.09
140766	ADAMTS14	mRNA	0.47	1.04	0.89	1.61	2.51	1.25
51195	RAPGEFL1	mRNA	0.35	0.71	0.58	1.2	1.56	0.86
2921	CXCL3	mRNA	31.48	27.95	31.38	52.77	66.94	40.45
3552	IL1A	mRNA	0.8	0.54	0.74	2.46	3.9	1.25
6352	CCL5	mRNA	8.67	10.0	9.98	16.03	20.11	12.74
26253	CLEC4E	mRNA	2.77	3.32	2.83	6.66	8.72	5.02
6354	CCL7	mRNA	149.89	166.25	156.13	724.94	964.94	437.78
54972	TMEM132A	mRNA	0.82	0.76	0.78	2.24	3.12	1.59
92737	DNER	mRNA	0.03	0.08	0.03	0.2	0.28	0.12
9362	CPNE6	mRNA	0.0	0.03	0.0	0.3	0.4	0.08
8722	CTSF	mRNA	3.92	3.12	3.25	4.14	4.55	5.43
83464	APH1B	mRNA	8.83	8.02	9.39	10.46	11.77	13.39
432	ASGR1	mRNA	2.54	2.07	2.95	3.28	3.81	4.69
3730	ANOS1	mRNA	0.59	0.34	0.5	0.75	0.88	0.98
368	ABCC6	mRNA	0.22	0.09	0.19	0.36	0.4	0.51
51205	ACP6	mRNA	1.34	1.07	1.37	1.61	1.68	1.75
92745	SLC38A5	mRNA	0.68	0.36	0.78	1.12	1.16	1.44
200942	KLHDC8B	mRNA	10.06	8.21	10.83	13.5	14.44	16.62
388389	CCDC103	mRNA	1.77	1.7	1.56	2.48	2.15	2.51
22921	MSRB2	mRNA	9.46	8.28	9.01	13.0	12.11	13.3
51665	ASB1	mRNA	4.19	3.64	3.93	7.07	6.2	7.2
639	PRDM1	mRNA	2.71	2.44	2.61	4.02	3.74	4.08
130367	SGPP2	mRNA	0.97	0.73	0.65	1.5	1.45	1.8
150372	NFAM1	mRNA	8.42	8.08	7.41	11.21	10.89	12.78
2859	GPR35	mRNA	5.1	4.14	4.58	11.34	10.48	14.35
148281	SYT6	mRNA	0.05	0.01	0.04	0.29	0.25	0.45
9899	SV2B	mRNA	0.2	0.16	0.23	0.67	0.59	0.81
7226	TRPM2	mRNA	36.13	34.9	34.63	55.45	54.19	63.05
162	AP1B1	mRNA	110.58	109.24	106.28	144.85	138.48	156.25
9625	AATK	mRNA	3.01	2.86	2.92	5.97	5.41	6.9
3363	HTR7	mRNA	3.44	3.56	3.57	5.38	4.43	5.57
101929805	LOC101929805	mRNA	0.17	0.18	0.19	0.43	0.33	0.54
84519	ACRBP	mRNA	2.43	2.48	2.44	3.75	3.28	4.09
4000	LMNA	mRNA	138.17	138.01	134.66	184.06	168.14	197.14
138151	NACC2	mRNA	4.91	5.33	4.79	7.43	6.66	7.73
9448	MAP4K4	mRNA	8.35	9.13	8.72	12.12	11.24	12.34
9658	ZNF516	mRNA	5.32	5.9	5.39	7.87	7.43	7.97
113235	SLC46A1	mRNA	11.87	12.16	12.26	17.44	16.36	18.05
283316	CD163L1	mRNA	28.4	29.14	30.49	61.88	54.37	64.66
5205	ATP8B1	mRNA	0.65	0.63	0.63	2.18	1.73	2.39
115207	KCTD12	mRNA	99.22	101.06	101.71	150.49	135.24	152.33
81848	SPRY4	mRNA	3.77	3.52	3.59	6.91	6.07	7.05
9644	SH3PXD2A	mRNA	8.63	8.34	7.91	14.58	12.86	14.52
7090	TLE3	mRNA	20.75	20.57	19.69	28.25	26.78	29.21
943	TNFRSF8	mRNA	0.19	0.18	0.11	0.55	0.44	0.57
9788	MTSS1	mRNA	9.12	10.66	9.95	16.6	14.69	18.09
57732	ZFYVE28	mRNA	3.88	4.27	4.41	6.69	5.95	7.0
55218	EXD2	mRNA	2.67	2.94	3.0	4.04	3.79	4.36
144110	TMEM86A	mRNA	17.41	17.58	18.18	28.33	27.63	30.56
3162	HMOX1	mRNA	204.49	204.98	212.11	368.67	351.02	407.24
3680	ITGA9	mRNA	1.82	1.83	1.92	2.83	2.83	3.15
6398	SECTM1	mRNA	8.97	9.51	9.49	29.65	29.84	36.86
140	ADORA3	mRNA	26.45	27.55	28.56	59.19	58.63	69.38
8879	SGPL1	mRNA	33.35	34.64	36.46	49.84	47.91	52.17
2867	FFAR2	mRNA	1.94	2.0	2.56	6.45	6.04	7.24
54453	RIN2	mRNA	16.79	19.28	18.78	28.41	28.16	31.04
55803	ADAP2	mRNA	51.19	54.27	52.76	77.65	75.83	81.04
41	ASIC1	mRNA	4.39	5.41	5.32	10.69	10.32	11.35
2215	FCGR3B	mRNA	0.6	0.52	0.47	0.89	0.89	1.39
284013	VMO1	mRNA	0.31	0.29	0.18	1.05	0.68	1.58
85508	SCRT2	mRNA	0.16	0.13	0.14	0.41	0.32	0.65
3664	IRF6	mRNA	0.22	0.28	0.35	0.47	0.49	0.7
9915	ARNT2	mRNA	0.1	0.14	0.17	0.47	0.54	0.89
11151	CORO1A	mRNA	143.38	160.69	162.46	196.85	203.66	248.02
4689	NCF4	mRNA	84.64	96.77	97.42	121.35	129.61	154.29
57156	TMEM63C	mRNA	0.35	0.28	0.4	0.65	0.66	0.93
10148	EBI3	mRNA	1.27	1.25	1.31	7.39	8.32	11.42
7849	PAX8	mRNA	1.35	1.28	1.37	1.86	1.85	2.08
6002	RGS12	mRNA	9.44	8.67	9.56	12.93	13.27	14.73
3394	IRF8	mRNA	26.45	25.55	27.23	36.85	38.09	42.45
7741	ZSCAN26	mRNA	3.92	4.28	3.85	5.69	6.0	7.12
9755	TBKBP1	mRNA	4.62	4.82	4.39	6.35	6.7	8.09
51225	ABI3	mRNA	50.77	52.02	49.58	68.54	71.23	83.43
113189	CHST14	mRNA	2.86	3.25	3.02	4.56	4.87	6.02
10365	KLF2	mRNA	1.66	1.97	1.81	2.7	2.74	3.45
5269	SERPINB6	mRNA	62.35	65.83	62.47	80.44	80.91	93.89
7133	TNFRSF1B	mRNA	80.19	85.41	79.54	115.53	115.8	139.79
3280	HES1	mRNA	0.54	0.71	0.58	1.29	1.29	1.94
340152	ZC3H12D	mRNA	3.28	3.65	3.5	5.47	5.33	7.07
55799	CACNA2D3	mRNA	0.61	0.98	1.08	2.15	2.32	2.98
1846	DUSP4	mRNA	3.82	4.05	4.16	5.51	5.49	6.14
23166	STAB1	mRNA	303.57	335.94	327.28	463.16	462.65	538.44
285195	SLC9A9	mRNA	23.99	27.59	27.01	36.4	36.8	42.1
27242	TNFRSF21	mRNA	6.91	7.61	7.88	12.9	12.65	15.95
10123	ARL4C	mRNA	3.83	4.3	4.89	9.13	8.77	11.98
57121	LPAR5	mRNA	6.84	7.13	7.61	12.27	12.48	15.51
388	RHOB	mRNA	8.06	8.42	8.79	11.52	11.76	13.89
22918	CD93	mRNA	30.44	37.3	35.13	73.35	67.37	92.11
23151	GRAMD4	mRNA	31.16	33.21	34.07	44.57	43.12	52.32
10990	LILRB5	mRNA	90.84	92.58	94.15	127.31	121.13	148.75
100996517	SEC22B3	pseudo	0.92	0.9	1.19	1.42	1.67	1.51
64837	KLC2	mRNA	2.76	2.72	2.95	3.67	3.94	3.69
3792	KEL	mRNA	0.2	0.15	0.26	0.56	0.69	0.53
400451	FAM174B	mRNA	1.9	1.81	2.09	2.74	3.15	2.77
116443	GRIN3A	mRNA	0.97	0.77	1.01	1.43	1.36	1.42
4324	MMP15	mRNA	1.8	1.39	1.82	2.46	2.39	2.45
10900	RUNDC3A	mRNA	0.18	0.03	0.21	0.48	0.55	0.41
79812	MMRN2	mRNA	0.24	0.18	0.28	0.51	0.51	0.44
8930	MBD4	mRNA	29.21	28.08	30.5	40.99	41.6	38.43
23528	ZNF281	mRNA	4.69	4.34	4.78	6.5	6.56	5.95
4752	NEK3	mRNA	2.43	2.33	2.82	3.45	3.33	3.65
414918	DENND6B	mRNA	1.62	1.93	2.54	3.66	4.37	4.91
3613	IMPA2	mRNA	8.35	9.14	10.08	12.11	12.98	13.78
51760	SYT17	mRNA	0.08	0.12	0.28	0.72	0.88	1.15
84830	ADTRP	mRNA	12.58	13.7	15.3	19.97	20.32	22.77
93589	CACNA2D4	mRNA	1.47	1.8	1.95	2.65	3.04	2.97
10653	SPINT2	mRNA	17.81	20.09	22.5	28.97	31.33	30.02
80022	MYO15B	mRNA	5.01	5.93	6.32	8.65	9.12	9.1
64092	SAMSN1	mRNA	66.23	73.47	77.35	97.0	101.66	101.75
127943	FCRLB	mRNA	2.32	2.46	2.79	4.98	5.63	4.9
84976	DISP1	mRNA	4.3	4.47	4.73	7.02	7.5	6.71
23555	TSPAN15	mRNA	36.73	37.94	39.67	51.01	53.07	50.77
51148	CERCAM	mRNA	5.88	6.31	6.31	8.7	8.97	8.5
26133	TRPC4AP	mRNA	33.71	35.82	36.85	48.17	49.42	46.82
112267855	LOC112267855	mRNA	2.77	3.08	3.75	5.88	6.68	6.54
79583	TMEM231	mRNA	1.19	1.22	1.33	1.73	1.86	1.79
26301	GBGT1	mRNA	15.98	16.57	17.31	21.96	23.17	22.91
962	CD48	mRNA	88.89	91.11	95.41	157.46	179.41	177.04
10135	NAMPT	mRNA	22.14	22.02	23.73	41.99	47.18	44.61
83937	RASSF4	mRNA	128.22	127.94	134.61	171.07	185.56	178.84
56729	RETN	mRNA	12.14	11.99	13.48	20.57	22.87	22.23
9051	PSTPIP1	mRNA	23.7	27.64	26.63	37.74	36.67	38.12
11320	MGAT4A	mRNA	11.29	12.84	12.36	17.84	18.18	18.07
6503	SLA	mRNA	50.71	56.6	55.19	74.32	74.54	74.9
6925	TCF4	mRNA	3.08	3.86	3.88	8.85	9.16	9.19
388115	CCDC9B	mRNA	0.89	1.03	1.06	1.95	1.95	2.02
10409	BASP1	mRNA	34.46	38.4	40.14	59.6	62.1	62.99
129642	MBOAT2	mRNA	2.28	2.55	2.51	3.72	3.87	3.92
57616	TSHZ3	mRNA	3.67	3.72	3.93	5.32	5.24	5.43
50619	DEF6	mRNA	30.25	31.56	32.88	44.38	44.88	46.42
83876	MRO	mRNA	0.69	0.86	1.05	2.02	2.01	2.07
399	RHOH	mRNA	0.77	0.9	1.05	1.97	1.99	1.96
23268	DNMBP	mRNA	2.33	2.54	2.67	3.98	4.03	3.98
56243	KIAA1217	mRNA	0.03	0.05	0.03	0.28	0.25	0.29
219972	MPEG1	mRNA	82.47	80.84	83.75	210.11	200.7	219.21
313	AOAH	mRNA	7.66	7.45	7.91	25.68	24.9	27.32
23129	PLXND1	mRNA	129.3	126.57	127.63	193.96	195.39	203.4
9935	MAFB	mRNA	91.12	88.35	88.2	200.74	203.87	216.04
5209	PFKFB3	mRNA	16.24	17.96	16.36	55.63	57.74	63.41
57580	PREX1	mRNA	30.76	31.52	31.41	56.38	56.31	60.36
155038	GIMAP8	mRNA	9.63	9.75	9.85	13.32	13.38	13.93
5338	PLD2	mRNA	5.34	5.45	5.36	7.93	8.13	8.29
4082	MARCKS	mRNA	69.21	71.59	72.78	139.09	141.94	148.94
64218	SEMA4A	mRNA	9.36	9.9	9.97	38.0	40.16	43.35
55332	DRAM1	mRNA	47.68	50.92	52.05	92.24	93.81	96.97
11326	VSIG4	mRNA	459.72	460.59	478.27	834.85	838.73	873.09
8685	MARCO	mRNA	116.55	114.4	113.58	540.71	547.37	563.37
272	AMPD3	mRNA	23.19	23.4	22.61	52.33	52.84	54.49
9766	SUSD6	mRNA	21.95	22.14	21.74	29.28	29.52	29.95
23428	SLC7A8	mRNA	78.89	75.84	74.51	127.63	127.83	130.85
10501	SEMA6B	mRNA	27.9	26.04	24.73	70.96	73.25	73.39
5452	POU2F2	mRNA	12.28	11.65	11.61	27.36	27.96	28.09
30011	SH3KBP1	mRNA	30.82	32.4	32.43	53.68	53.02	54.13
10630	PDPN	mRNA	0.4	0.4	0.47	4.98	5.01	4.96
144811	LACC1	mRNA	64.19	65.69	70.26	173.05	176.44	177.95
11213	IRAK3	mRNA	7.1	7.42	7.83	15.95	16.28	16.37
57326	PBXIP1	mRNA	10.96	10.9	11.52	14.58	15.04	15.05
8778	SIGLEC5	mRNA	19.91	17.91	20.63	42.91	44.73	45.67
54751	FBLIM1	mRNA	2.49	2.38	2.68	4.87	5.06	5.26
168544	ZNF467	mRNA	10.81	10.24	10.64	14.99	15.55	16.0
23328	SASH1	mRNA	4.46	4.12	4.14	7.35	7.78	7.85
5031	P2RY6	mRNA	34.31	33.67	34.49	71.3	75.59	78.58
28514	DLL1	mRNA	0.38	0.44	0.45	9.0	10.7	11.5
6280	S100A9	mRNA	772.35	787.73	806.52	1403.84	1519.45	1563.38
9056	SLC7A7	mRNA	92.9	90.84	92.2	130.8	139.1	136.62
53831	GPR84	mRNA	43.91	41.71	43.08	115.12	135.06	133.56
220323	OAF	mRNA	5.0	5.74	5.33	10.97	12.28	12.93
3985	LIMK2	mRNA	9.26	11.36	10.4	27.76	31.05	32.23
2214	FCGR3A	mRNA	68.18	75.59	74.9	133.62	145.65	152.12
3274	HRH2	mRNA	8.81	9.9	8.79	17.4	18.19	19.21
7439	BEST1	mRNA	10.1	10.85	10.52	15.69	16.37	16.7
80003	PCNX2	mRNA	0.35	0.49	0.41	1.15	1.24	1.23
64115	VSIR	mRNA	20.92	22.68	21.81	41.32	44.84	44.04
1107	CHD3	mRNA	8.15	8.59	8.27	11.6	12.01	11.9
101	ADAM8	mRNA	10.0	12.21	10.51	35.19	37.23	36.87
23208	SYT11	mRNA	7.88	8.09	8.26	10.95	11.41	11.21
653361	NCF1	mRNA	9.88	9.98	8.67	84.11	92.73	90.7
58475	MS4A7	mRNA	36.1	39.08	39.76	151.3	164.91	165.99
57558	USP35	mRNA	1.68	1.65	2.29	2.29	2.94	2.86
6580	SLC22A1	mRNA	0.05	0.06	0.18	0.24	0.43	0.37
1912	PHC2	mRNA	35.66	39.76	36.23	51.0	56.32	59.9
8507	ENC1	mRNA	12.82	16.76	15.39	25.9	28.96	33.08
64943	NT5DC2	mRNA	42.44	46.43	45.61	60.55	67.21	71.17
54498	SMOX	mRNA	18.33	19.47	18.46	26.57	27.69	29.8
201176	ARHGAP27	mRNA	21.2	23.26	21.85	31.29	32.54	34.31
25893	TRIM58	mRNA	3.39	3.58	3.4	4.67	4.84	5.32
7462	LAT2	mRNA	45.31	48.6	48.25	64.72	67.73	74.07
5360	PLTP	mRNA	92.99	136.41	115.5	354.15	383.42	464.88
54910	SEMA4C	mRNA	1.89	1.97	2.3	4.88	5.57	5.93
440836	ODF3B	mRNA	7.5	8.61	8.72	14.04	16.01	16.55
1890	TYMP	mRNA	182.06	195.09	187.93	251.36	272.04	280.08
3763	KCNJ6	mRNA	0.02	0.04	0.06	0.33	0.42	0.51
79847	MFSD13A	mRNA	8.87	9.65	9.76	15.07	16.93	18.41
285848	PNPLA1	mRNA	0.19	0.25	0.2	0.61	0.72	0.82
100	ADA	mRNA	13.67	15.38	13.89	34.27	40.98	45.11
3801	KIFC3	mRNA	19.99	20.18	19.89	27.3	28.34	30.38
5739	PTGIR	mRNA	1.56	1.59	1.72	4.06	4.49	5.29
122953	JDP2	mRNA	22.91	23.39	23.75	34.4	36.18	39.87
64005	MYO1G	mRNA	22.79	24.75	24.04	52.5	55.51	61.99
64926	RASAL3	mRNA	8.23	8.78	8.84	15.74	16.7	18.23
5272	SERPINB9	mRNA	10.59	12.22	12.43	22.95	24.71	27.09
9638	FEZ1	mRNA	2.02	2.35	2.27	4.23	4.37	4.98
10855	HPSE	mRNA	12.57	14.54	14.82	28.99	30.78	35.58
2817	GPC1	mRNA	0.58	0.73	0.77	1.21	1.38	1.43
1992	SERPINB1	mRNA	35.82	38.76	40.58	51.18	54.14	56.75
8578	SCARF1	mRNA	8.17	9.32	8.97	12.21	13.17	13.71
1848	DUSP6	mRNA	21.69	25.52	24.84	38.92	41.52	45.11
8506	CNTNAP1	mRNA	0.31	0.45	0.45	0.93	1.03	1.14
284996	RNF149	mRNA	30.54	33.6	33.73	45.07	47.37	48.34
3588	IL10RB	mRNA	59.53	63.77	65.05	81.96	86.16	87.6
10509	SEMA4B	mRNA	10.18	11.78	11.61	19.25	20.38	21.29
11188	NISCH	mRNA	27.13	29.58	29.42	41.66	44.36	46.38
84689	MS4A14	mRNA	1.88	2.43	2.48	5.3	5.95	6.31
133	ADM	mRNA	9.67	11.92	10.98	18.56	23.55	23.09
2841	GPR18	mRNA	0.1	0.18	0.18	0.54	0.75	0.78
3797	KIF3C	mRNA	2.5	2.69	2.87	3.99	4.58	4.82
2643	GCH1	mRNA	2.92	3.37	3.77	5.62	7.18	7.07
57804	POLD4	mRNA	22.87	23.18	24.28	29.72	33.09	32.7
2535	FZD2	mRNA	1.89	2.42	2.63	3.91	4.7	5.47
53917	RAB24	mRNA	10.5	11.04	11.27	13.37	14.91	15.93
170575	GIMAP1	mRNA	4.07	4.85	4.67	6.26	7.43	8.23
4047	LSS	mRNA	27.73	32.75	30.2	37.87	43.01	47.11
10347	ABCA7	mRNA	5.96	6.47	6.13	7.51	8.57	9.32
10516	FBLN5	mRNA	0.02	0.06	0.05	0.15	0.21	0.29
4681	NBL1	mRNA	1.03	0.86	0.83	1.81	2.16	2.85
7108	TM7SF2	mRNA	13.77	12.59	13.45	18.4	21.58	23.41
23400	ATP13A2	mRNA	10.63	11.06	10.75	17.66	20.9	23.72
9351	SLC9A3R2	mRNA	0.57	0.52	0.49	0.87	1.01	1.13
79651	RHBDF2	mRNA	14.59	14.48	14.02	18.55	20.63	21.75
430	ASCL2	mRNA	0.67	0.76	0.89	1.21	1.77	1.63
114783	LMTK3	mRNA	0.23	0.27	0.27	0.37	0.49	0.44
134285	TMEM171	mRNA	0.0	0.09	0.11	0.42	0.67	0.57
79818	ZNF552	mRNA	3.47	3.72	3.83	4.82	5.63	5.33
256329	LMNTD2	mRNA	0.38	0.42	0.44	0.65	1.1	1.12
9891	NUAK1	mRNA	0.0	0.0	0.0	0.04	0.08	0.09
64748	PLPPR2	mRNA	2.8	2.76	2.89	3.81	4.62	4.93
50486	G0S2	mRNA	20.8	19.94	21.25	35.14	49.22	49.51
3993	LLGL2	mRNA	1.78	1.78	1.9	2.74	3.65	3.63
5142	PDE4B	mRNA	1.97	1.9	2.01	2.81	3.68	3.52
64856	VWA1	mRNA	0.14	0.14	0.16	0.35	0.51	0.48
6583	SLC22A4	mRNA	1.13	0.86	0.91	2.32	3.0	2.69
9641	IKBKE	mRNA	14.35	13.25	13.1	18.15	20.42	19.27
84557	MAP1LC3A	mRNA	8.14	7.78	7.93	11.1	12.47	12.07
10938	EHD1	mRNA	14.6	13.93	13.36	22.41	26.1	24.96
399473	SPRED3	mRNA	0.72	0.64	0.67	1.02	1.28	1.24
5217	PFN2	mRNA	0.07	0.03	0.03	0.17	0.28	0.27
147699	PPM1N	mRNA	2.64	2.62	2.22	4.89	6.78	6.36
221188	ADGRG5	mRNA	0.06	0.06	0.03	0.15	0.21	0.21
9823	ARMCX2	mRNA	0.82	0.84	0.76	1.18	1.41	1.39
11027	LILRA2	mRNA	3.75	3.62	3.11	6.51	8.57	8.56
59341	TRPV4	mRNA	28.5	26.26	26.79	35.61	38.15	39.6
4814	NINJ1	mRNA	141.63	138.15	142.3	222.65	247.26	255.71
151306	GPBAR1	mRNA	2.22	1.68	1.76	8.67	10.73	11.42
57085	AGTRAP	mRNA	35.62	34.59	34.42	52.86	58.93	60.6
5971	RELB	mRNA	9.63	9.51	9.32	12.63	13.56	14.11
126364	LRRC25	mRNA	87.3	86.62	85.12	139.63	153.53	167.64
11182	SLC2A6	mRNA	11.21	11.59	11.75	17.67	20.65	20.34
2357	FPR1	mRNA	47.31	51.61	50.55	87.56	103.1	104.0
89858	SIGLEC12	mRNA	6.66	7.21	6.73	12.41	15.16	14.95
4792	NFKBIA	mRNA	62.86	65.81	63.18	88.67	100.83	100.77
11024	LILRA1	mRNA	0.64	0.67	0.59	2.41	3.11	3.12
4818	NKG7	mRNA	2.7	2.81	2.57	7.57	9.93	9.78
3604	TNFRSF9	mRNA	0.9	0.95	0.83	2.35	2.65	2.61
196383	RILPL2	mRNA	22.74	23.37	22.42	30.94	32.8	32.89
83637	ZMIZ2	mRNA	20.0	20.22	19.81	26.4	28.5	28.12
64386	MMP25	mRNA	5.11	4.95	4.32	11.45	13.67	13.5
23138	N4BP3	mRNA	0.04	0.01	0.04	0.1	0.14	0.14
101929796	NOTCH2NLR	pseudo	0.68	0.57	0.55	0.82	0.98	0.98
7130	TNFAIP6	mRNA	0.56	0.29	0.28	0.77	1.22	1.18
55924	INKA2	mRNA	1.62	1.59	1.23	1.99	1.96	2.02
200312	RNF215	mRNA	1.95	2.43	1.65	3.27	3.27	3.29
344558	SH3RF3	mRNA	0.84	1.03	0.69	1.33	1.3	1.26
85446	ZFHX2	mRNA	0.58	0.62	0.43	0.89	0.98	0.88
55911	APOBR	mRNA	35.35	36.41	30.01	52.16	51.57	50.36
10809	STARD10	mRNA	1.09	1.15	0.72	1.93	1.84	1.76
283229	CRACR2B	mRNA	0.81	0.9	0.66	1.3	1.38	1.55
57715	SEMA4G	mRNA	0.23	0.28	0.16	0.45	0.46	0.52
89853	MVB12B	mRNA	1.03	1.17	0.89	1.88	1.81	2.11
167838	TXLNB	mRNA	2.18	2.24	1.9	3.05	2.89	3.38
9805	SCRN1	mRNA	2.89	2.92	2.51	4.28	4.57	5.03
80139	ZNF703	mRNA	16.19	15.55	14.71	21.79	22.7	25.6
57567	ZNF319	mRNA	5.62	5.36	4.91	8.56	9.04	9.16
85461	TANC1	mRNA	0.33	0.34	0.29	0.64	0.65	0.72
100049587	SIGLEC14	mRNA	15.6	16.12	13.67	29.19	30.31	31.97
7280	TUBB2A	mRNA	22.71	22.37	20.46	37.42	37.3	42.38
433	ASGR2	mRNA	3.76	3.44	3.39	5.7	5.59	6.24
5155	PDGFB	mRNA	2.03	1.93	1.97	2.89	2.9	3.17
10043	TOM1	mRNA	48.8	47.44	48.41	71.06	71.97	76.9
6999	TDO2	mRNA	2.99	2.75	2.65	6.92	7.45	8.34
149345	SHISA4	mRNA	1.85	1.61	1.62	3.07	3.31	3.54
729438	CASTOR2	mRNA	1.22	1.31	0.99	1.95	2.09	2.12
10957	PNRC1	mRNA	20.56	21.43	19.57	27.3	28.98	29.45
1606	DGKA	mRNA	6.19	6.72	6.12	8.6	8.6	8.87
114625	ERMAP	mRNA	3.49	3.64	3.17	5.02	5.02	5.05
51700	CYB5R2	mRNA	1.37	1.66	1.18	3.6	3.8	3.68
124359	CDYL2	mRNA	1.75	1.87	1.79	2.61	2.99	2.77
27239	GPR162	mRNA	4.18	4.89	4.18	7.95	9.61	8.71
5355	PLP2	mRNA	89.35	98.53	88.21	145.87	163.28	154.12
51411	BIN2	mRNA	47.15	51.67	48.51	72.41	77.34	74.09
6404	SELPLG	mRNA	51.67	57.09	51.63	109.55	123.17	114.66
2906	GRIN2D	mRNA	0.88	1.03	0.92	1.28	1.44	1.39
84069	PLEKHN1	mRNA	0.11	0.24	0.15	0.54	0.61	0.61
6281	S100A10	mRNA	163.85	178.09	173.17	221.45	236.12	234.64
79946	C10orf95	mRNA	0.71	0.96	0.67	1.29	1.63	1.64
602	BCL3	mRNA	30.07	34.01	27.97	41.28	49.85	49.22
9603	NFE2L3	mRNA	2.66	3.13	2.45	4.24	4.48	4.66
6666	SOX12	mRNA	2.83	3.41	2.73	4.59	5.23	5.34
5743	PTGS2	mRNA	1.12	1.42	1.24	2.11	2.13	2.43
1831	TSC22D3	mRNA	9.8	11.72	10.7	14.99	15.56	16.67
3177	SLC29A2	mRNA	0.94	1.15	0.92	1.49	1.53	1.74
54541	DDIT4	mRNA	4.32	7.19	5.67	10.63	11.45	13.95
80162	PGGHG	mRNA	0.65	1.37	0.84	2.3	2.59	3.11
9672	SDC3	mRNA	6.93	8.73	7.35	10.83	11.94	13.05
349667	RTN4RL2	mRNA	1.15	1.82	1.16	2.39	2.56	2.6
497189	TIFAB	mRNA	2.73	3.5	2.9	4.16	4.24	4.52
9322	TRIP10	mRNA	6.72	8.43	7.32	10.31	10.73	11.48
158880	USP51	mRNA	0.87	1.1	0.89	1.36	1.28	1.24
1952	CELSR2	mRNA	0.35	0.49	0.35	0.73	0.77	0.75
55784	MCTP2	mRNA	0.59	0.87	0.69	1.26	1.28	1.23
57683	ZDBF2	mRNA	0.35	0.49	0.38	0.68	0.72	0.66
79168	LILRA6	mRNA	34.45	38.49	31.75	54.14	51.61	51.98
283638	CEP170B	mRNA	3.44	4.05	3.53	5.12	4.97	5.12
85456	TNKS1BP1	mRNA	3.1	3.3	2.78	4.7	4.48	3.95
221002	RASGEF1A	mRNA	0.19	0.17	0.07	0.49	0.5	0.35
23467	NPTXR	mRNA	0.25	0.22	0.14	0.88	0.88	0.59
9187	SLC24A1	mRNA	1.49	1.67	1.55	2.19	2.15	1.89
51267	CLEC1A	mRNA	1.48	1.89	1.56	3.63	3.31	2.84
1889	ECE1	mRNA	0.47	0.66	0.54	1.15	1.07	0.91
392275	SMPD5	pseudo	0.1	0.28	0.11	0.51	0.55	0.39
25832	NBPF14	mRNA	4.58	5.12	4.48	6.84	6.67	6.17
23098	SARM1	mRNA	0.32	0.41	0.31	0.64	0.67	0.58
84866	TMEM25	mRNA	0.06	0.07	0.13	0.46	0.32	0.3
3815	KIT	mRNA	0.21	0.2	0.25	0.45	0.38	0.37
10758	TRAF3IP2	mRNA	3.3	3.51	3.52	5.76	5.35	4.98
9751	SNPH	mRNA	0.4	0.47	0.47	0.86	0.79	0.74
79884	MAP9	mRNA	0.18	0.21	0.22	0.42	0.39	0.35
395	ARHGAP6	mRNA	0.8	0.77	0.81	1.62	1.46	1.28
9497	SLC4A7	mRNA	5.99	5.84	6.38	10.17	9.5	8.7
91522	COL23A1	mRNA	3.28	3.16	3.55	12.79	11.5	10.23
55717	WDR11	mRNA	33.01	32.86	33.27	57.53	55.38	50.19
11226	GALNT6	mRNA	10.69	10.3	10.5	18.17	17.3	15.96
3454	IFNAR1	mRNA	33.47	33.9	33.02	55.07	51.23	48.98
7187	TRAF3	mRNA	8.12	8.25	8.01	12.34	11.41	10.93
115548	FCHO2	mRNA	10.84	10.95	11.0	20.87	18.52	17.52
5980	REV3L	mRNA	1.58	1.45	1.54	2.4	2.06	2.12
7096	TLR1	mRNA	24.35	23.91	22.93	37.59	31.97	32.22
4644	MYO5A	mRNA	18.6	17.29	16.62	26.62	22.45	22.75
23499	MACF1	mRNA	13.68	13.16	12.35	19.62	16.57	17.27
5362	PLXNA2	mRNA	1.82	1.98	1.67	3.11	2.66	2.91
4249	MGAT5	mRNA	21.32	21.79	20.48	29.84	26.6	28.9
11026	LILRA3	mRNA	0.03	0.07	0.0	0.93	0.58	0.75
5244	ABCB4	mRNA	3.67	3.97	3.64	6.17	5.03	5.59
1374	CPT1A	mRNA	10.43	9.76	9.74	15.02	13.18	14.02
4035	LRP1	mRNA	111.85	102.17	96.67	165.65	143.09	153.49
55534	MAML3	mRNA	0.76	0.76	0.7	1.18	1.06	1.06
89796	NAV1	mRNA	3.01	3.1	2.84	6.0	5.26	5.47
219623	TMEM26	mRNA	4.78	5.1	5.19	9.18	7.66	8.15
57491	AHRR	mRNA	10.4	10.4	10.8	14.88	13.25	14.26
7582	ZNF33B	mRNA	0.6	0.61	0.72	1.43	1.17	1.29
2865	FFAR3	mRNA	0.07	0.14	0.33	1.53	1.04	1.31
83992	CTTNBP2	mRNA	1.28	1.22	1.16	3.63	2.89	3.3
91748	ELMSAN1	mRNA	4.76	4.7	4.68	6.65	6.01	6.33
5208	PFKFB2	mRNA	3.96	3.92	4.0	5.82	5.23	5.48
4651	MYO10	mRNA	1.23	1.17	1.23	2.42	2.03	2.26
55236	UBA6	mRNA	12.03	12.5	11.93	18.77	16.86	18.4
55203	LGI2	mRNA	0.51	0.95	0.77	4.66	3.32	4.24
8323	FZD6	mRNA	0.69	0.83	0.79	1.39	1.09	1.31
81557	MAGED4B	mRNA	0.1	0.15	0.15	0.45	0.32	0.45
728239	MAGED4	mRNA	0.1	0.15	0.15	0.45	0.32	0.45
29933	GPR132	mRNA	3.69	3.61	3.5	6.4	5.1	6.21
8214	DGCR6	mRNA	0.0	0.0	0.0	0.49	0.23	0.38
57060	PCBP4	mRNA	0.27	0.3	0.43	0.84	0.68	0.85
114881	OSBPL7	mRNA	1.18	1.48	1.53	3.09	2.75	3.09
2353	FOS	mRNA	9.72	10.27	10.68	16.24	15.23	16.71
6304	SATB1	mRNA	3.79	3.71	4.31	5.73	5.65	5.76
100996717	NOTCH2NLC	mRNA	2.71	2.64	3.0	4.01	3.71	3.81
57513	CASKIN2	mRNA	2.66	2.76	2.98	3.86	3.58	3.75
2119	ETV5	mRNA	40.38	39.41	41.03	65.66	64.08	64.76
5175	PECAM1	mRNA	41.73	39.82	41.93	68.48	65.87	65.89
126549	ANKLE1	mRNA	1.13	1.11	1.16	1.59	1.59	1.58
2517	FUCA1	mRNA	830.94	796.82	877.01	1721.74	1685.04	1678.87
2113	ETS1	mRNA	1.11	1.06	1.12	1.93	1.92	1.85
64750	SMURF2	mRNA	7.27	7.13	7.25	15.62	15.68	15.0
6857	SYT1	mRNA	0.85	0.87	0.98	1.67	1.58	1.63
6947	TCN1	mRNA	0.76	0.63	0.86	2.44	2.16	2.15
57568	SIPA1L2	mRNA	4.32	4.55	4.17	6.33	5.94	5.92
710	SERPING1	mRNA	4.7	5.15	4.85	7.84	7.34	7.21
5502	PPP1R1A	mRNA	0.26	0.5	0.32	2.17	1.75	1.69
166929	SGMS2	mRNA	1.88	1.99	1.97	3.02	2.76	2.84
7402	UTRN	mRNA	7.02	7.9	7.5	10.99	10.22	10.4
23329	TBC1D30	mRNA	0.33	0.41	0.38	0.92	0.83	0.86
9332	CD163	mRNA	473.03	511.3	483.02	704.87	670.53	690.17
255488	RNF144B	mRNA	4.83	5.3	5.34	7.86	7.49	7.28
64332	NFKBIZ	mRNA	6.39	7.0	7.03	10.17	9.99	9.89
151963	MB21D2	mRNA	2.16	2.37	2.36	3.69	3.54	3.59
2004	ELK3	mRNA	4.36	5.29	4.78	10.22	10.13	9.64
8425	LTBP4	mRNA	2.46	2.6	2.49	3.36	3.42	3.36
56659	KCNK13	mRNA	3.52	3.81	3.59	4.91	4.88	4.87
6804	STX1A	mRNA	1.74	2.49	2.21	6.07	6.02	5.98
30817	ADGRE2	mRNA	13.17	13.62	12.78	24.85	24.4	23.09
2533	FYB1	mRNA	18.69	18.81	18.31	32.69	31.79	30.78
10461	MERTK	mRNA	32.68	32.74	32.06	65.86	64.66	61.7
838	CASP5	mRNA	1.61	2.1	1.75	7.22	6.95	6.54
56944	OLFML3	mRNA	0.19	0.28	0.17	1.65	1.62	1.56
9770	RASSF2	mRNA	21.45	22.73	21.89	38.95	39.08	37.8
56666	PANX2	mRNA	0.54	0.66	0.48	1.65	1.59	1.56
8605	PLA2G4C	mRNA	5.55	5.76	5.49	8.64	8.22	8.25
1240	CMKLR1	mRNA	34.6	35.53	34.7	59.71	57.02	58.12
7048	TGFBR2	mRNA	51.07	53.23	51.71	73.2	70.42	72.03
51131	PHF11	mRNA	2.46	3.95	3.82	4.8	4.96	4.96
348094	ANKDD1A	mRNA	1.15	1.96	1.74	2.39	2.9	2.37
55258	THNSL2	mRNA	0.15	0.42	0.29	0.54	0.63	0.47
126432	RINL	mRNA	1.49	1.79	1.96	2.12	2.61	2.41
140947	DCANP1	mRNA	1.59	2.28	2.4	2.79	3.63	2.95
284759	SIRPB2	mRNA	8.75	10.5	9.88	12.62	13.81	13.69
4485	MST1	mRNA	0.9	1.22	1.04	1.44	1.7	1.68
971	CD72	mRNA	1.67	2.4	2.06	2.95	3.28	2.99
100130370	LOC100130370	lncRNA	0.08	0.17	0.13	0.24	0.33	0.28
65998	C11orf95	mRNA	0.81	0.89	1.1	1.36	1.21	1.2
7075	TIE1	mRNA	0.56	0.66	0.86	1.21	1.09	0.94
254887	ZDHHC23	mRNA	0.15	0.2	0.31	0.39	0.35	0.4
25816	TNFAIP8	mRNA	17.79	19.8	22.61	27.9	26.16	28.6
8786	RGS11	mRNA	0.14	0.16	0.33	0.55	0.43	0.57
83719	YPEL3	mRNA	9.78	11.9	11.19	17.18	16.03	15.55
540	ATP7B	mRNA	0.32	0.39	0.35	0.73	0.61	0.61
10863	ADAM28	mRNA	6.4	8.16	6.92	12.87	11.17	10.82
23127	COLGALT2	mRNA	0.77	1.12	0.91	2.13	1.67	1.72
1600	DAB1	mRNA	0.27	0.44	0.43	0.8	0.66	0.58
112268381	LOC112268381	mRNA	0.63	0.7	0.74	1.0	0.87	0.86
153222	CREBRF	mRNA	1.05	1.27	1.51	1.88	1.81	1.8
128497	SPATA25	mRNA	0.3	0.53	0.71	1.32	1.21	1.18
4157	MC1R	mRNA	1.12	1.38	1.49	2.15	2.03	1.99
51299	NRN1	mRNA	0.58	0.9	0.97	1.69	1.55	1.6
1089	CEACAM4	mRNA	0.75	1.21	1.29	2.74	2.53	2.6
57577	CCDC191	mRNA	0.59	0.65	0.81	1.09	1.09	1.0
3778	KCNMA1	mRNA	4.69	4.79	5.64	7.91	7.65	7.35
56937	PMEPA1	mRNA	0.18	0.18	0.3	0.56	0.55	0.46
7053	TGM3	mRNA	0.51	0.64	0.71	0.99	1.1	0.94
7059	THBS3	mRNA	3.16	3.5	3.79	5.42	6.0	5.14
149473	CCDC24	mRNA	1.33	1.72	1.85	2.67	2.7	2.43
51088	KLHL5	mRNA	6.24	7.28	7.04	10.11	10.29	9.59
10507	SEMA4D	mRNA	3.42	4.23	4.1	5.82	6.02	5.35
347733	TUBB2B	mRNA	0.79	1.17	0.72	1.12	1.83	1.7
2281	FKBP1B	mRNA	4.13	3.6	3.61	4.7	7.49	7.3
30008	EFEMP2	mRNA	0.64	0.58	0.58	0.76	1.48	1.25
107987285	LOC107987285	mRNA	0.04	0.03	0.0	0.1	0.16	0.14
79650	USB1	mRNA	31.34	31.93	29.52	41.62	46.78	44.91
84166	NLRC5	mRNA	2.73	2.82	2.39	3.73	4.16	3.95
79789	CLMN	mRNA	2.47	2.36	2.22	3.26	4.11	3.52
9435	CHST2	mRNA	4.52	4.27	4.04	7.17	9.52	8.18
90956	ADCK2	mRNA	21.82	21.06	20.6	27.75	32.36	29.19
126014	OSCAR	mRNA	31.5	30.69	29.82	38.9	44.13	40.57
22809	ATF5	mRNA	39.23	39.15	35.43	51.25	56.14	51.18
727800	RNF208	mRNA	2.27	2.35	1.72	4.28	5.13	4.51
2219	FCN1	mRNA	12.4	10.91	9.3	22.39	26.15	22.0
150365	MEI1	mRNA	1.78	1.52	1.26	2.77	3.32	2.91
2358	FPR2	mRNA	0.59	0.65	0.8	2.56	3.74	3.1
9333	TGM5	mRNA	0.3	0.32	0.32	0.87	1.32	1.03
7980	TFPI2	mRNA	0.02	0.02	0.02	0.27	0.45	0.32
731220	RFX8	mRNA	0.04	0.04	0.08	0.25	0.47	0.31
1084	CEACAM3	mRNA	0.28	0.63	0.5	6.24	10.53	6.64
56925	LXN	mRNA	11.14	10.57	11.0	14.63	17.72	14.89
84966	IGSF21	mRNA	0.04	0.07	0.03	0.17	0.32	0.21
30845	EHD3	mRNA	0.79	0.91	0.76	1.13	1.49	1.27
162989	DEDD2	mRNA	15.96	17.3	16.43	20.34	25.18	23.81
83999	KREMEN1	mRNA	2.49	2.84	2.58	3.34	3.98	3.68
117854	TRIM6	mRNA	2.17	2.34	2.23	2.88	3.34	3.15
80325	ABTB1	mRNA	5.31	5.94	5.69	7.65	9.09	8.24
144423	GLT1D1	mRNA	0.91	0.47	0.47	1.23	2.0	1.29
105373780	LOC105373780	mRNA	0.67	0.62	0.49	0.77	1.26	0.95
771	CA12	mRNA	0.08	0.07	0.13	0.82	1.76	0.66
10215	OLIG2	mRNA	0.02	0.0	0.0	0.12	0.36	0.13
2027	ENO3	mRNA	1.53	1.74	1.57	2.21	3.26	2.4
643866	CBLN3	mRNA	0.67	0.82	0.78	1.34	2.23	1.5
255231	MCOLN2	mRNA	0.9	0.97	0.97	1.22	1.62	1.35
652968	CASTOR1	mRNA	2.35	2.95	3.09	4.51	6.58	4.86
51738	GHRL	mRNA	0.92	1.39	0.64	1.63	2.57	1.83
6368	CCL23	mRNA	3.07	3.17	2.27	5.12	6.67	4.45
6283	S100A12	mRNA	6.75	8.06	4.99	11.47	14.91	11.37
7082	TJP1	mRNA	0.24	0.12	0.14	0.28	0.31	0.3
6253	RTN2	mRNA	9.38	7.64	8.64	12.93	13.09	13.78
554	AVPR2	mRNA	0.67	0.35	0.39	0.97	1.0	1.05
2184	FAH	mRNA	44.02	37.52	39.89	54.1	56.43	56.18
644815	FAM83G	mRNA	1.52	1.2	1.34	1.85	1.93	1.89
85379	KIAA1671	mRNA	3.45	3.08	2.78	5.92	5.46	5.12
4810	NHS	mRNA	0.21	0.19	0.16	0.4	0.37	0.34
84627	ZNF469	mRNA	0.75	0.69	0.6	1.24	1.09	1.11
8972	MGAM	mRNA	0.79	0.71	0.64	1.39	1.23	1.21
10184	LHFPL2	mRNA	81.62	73.68	75.07	111.19	101.23	103.19
342184	FMN1	mRNA	8.16	7.24	7.17	10.87	9.86	10.12
2022	ENG	mRNA	292.22	253.77	255.54	382.74	357.34	369.38
125058	TBC1D16	mRNA	3.67	3.32	3.23	5.16	4.85	4.91
100526771	SMIM35	mRNA	0.43	0.34	0.3	0.75	0.67	0.67
687	KLF9	mRNA	5.25	4.71	4.86	7.33	6.98	6.63
23705	CADM1	mRNA	1.35	0.91	1.12	3.59	3.01	3.03
3667	IRS1	mRNA	0.03	0.01	0.02	0.08	0.07	0.07
8291	DYSF	mRNA	15.09	12.26	11.91	26.5	25.82	24.19
7805	LAPTM5	mRNA	1178.33	1103.52	1103.8	1676.02	1653.84	1590.65
285590	SH3PXD2B	mRNA	21.39	18.82	18.38	44.23	45.94	40.13
128346	C1orf162	mRNA	186.74	178.58	173.18	285.7	290.33	268.73
26235	FBXL4	mRNA	3.66	3.37	3.36	5.5	5.55	5.12
283149	BCL9L	mRNA	5.94	5.28	5.22	12.0	12.04	10.89
124935	SLC43A2	mRNA	12.07	10.67	10.94	20.25	20.85	18.5
8878	SQSTM1	mRNA	279.39	258.65	264.97	372.67	382.22	357.98
220002	CYB561A3	mRNA	96.01	83.25	84.93	148.1	152.04	139.02
221178	SPATA13	mRNA	6.22	5.91	6.14	10.06	9.82	9.35
5796	PTPRK	mRNA	0.3	0.25	0.25	1.09	1.03	0.96
51311	TLR8	mRNA	5.96	5.49	5.44	23.21	21.65	19.82
4041	LRP5	mRNA	2.83	2.62	2.76	4.46	4.25	4.16
7107	GPR137B	mRNA	85.69	80.68	80.52	127.71	122.07	121.08
3914	LAMB3	mRNA	11.2	10.14	10.23	20.16	18.7	18.52
1955	MEGF9	mRNA	7.04	5.55	6.31	12.3	11.99	11.53
1728	NQO1	mRNA	50.68	44.97	49.71	77.81	79.15	76.32
3695	ITGB7	mRNA	32.03	28.38	31.55	51.56	51.17	51.18
10154	PLXNC1	mRNA	36.25	31.44	31.27	63.81	56.59	60.64
5654	HTRA1	mRNA	9.25	8.33	7.81	18.03	16.81	17.37
5339	PLEC	mRNA	52.9	50.52	48.95	80.33	75.28	78.31
374872	PEAK3	mRNA	2.65	2.58	2.44	5.83	5.34	5.69
54434	SSH1	mRNA	10.16	9.89	9.94	16.29	15.03	15.86
9732	DOCK4	mRNA	13.51	12.73	12.86	23.63	21.24	22.08
7057	THBS1	mRNA	4.02	3.57	3.85	11.56	10.07	10.59
3091	HIF1A	mRNA	58.02	57.62	58.05	88.39	83.65	84.39
54704	PDP1	mRNA	5.25	5.13	5.02	9.43	8.56	8.66
23533	PIK3R5	mRNA	50.86	46.57	45.31	74.04	72.47	73.21
9620	CELSR1	mRNA	7.2	6.68	6.54	10.6	10.6	10.91
29785	CYP2S1	mRNA	41.55	38.9	37.45	56.95	55.68	57.77
101060226	NBPF19	mRNA	4.41	4.34	4.0	9.39	9.24	9.01
4851	NOTCH1	mRNA	14.11	14.18	13.2	27.08	26.27	26.03
55691	FRMD4A	mRNA	12.55	12.39	11.88	16.91	16.53	16.71
169792	GLIS3	mRNA	0.26	0.25	0.24	0.63	0.6	0.62
3903	LAIR1	mRNA	120.44	116.13	115.22	169.07	172.55	167.38
3749	KCNC4	mRNA	2.4	1.99	1.91	5.94	6.22	6.11
57713	SFMBT2	mRNA	4.97	4.66	4.67	7.66	7.48	7.48
864	RUNX3	mRNA	14.85	13.93	13.56	21.86	21.79	21.29
80790	CMIP	mRNA	38.2	36.08	34.42	64.27	63.62	62.07
728	C5AR1	mRNA	245.76	213.53	206.97	320.46	320.66	281.01
23312	DMXL2	mRNA	25.58	22.76	22.18	35.09	33.2	30.83
64778	FNDC3B	mRNA	25.84	22.71	22.41	36.82	35.78	31.25
28996	HIPK2	mRNA	3.72	3.29	2.98	6.06	5.68	4.9
960	CD44	mRNA	130.82	114.49	118.14	180.99	184.95	158.41
80045	GPR157	mRNA	1.37	0.75	0.94	2.61	2.6	1.99
56833	SLAMF8	mRNA	172.63	151.11	158.43	222.77	226.03	203.8
2495	FTH1	mRNA	12151.85	10403.16	9994.49	22543.41	23903.58	19862.23
10371	SEMA3A	mRNA	1.26	0.86	0.89	2.35	2.58	2.02
6714	SRC	mRNA	25.99	23.42	24.1	40.31	39.67	34.9
1536	CYBB	mRNA	509.19	481.29	484.12	756.49	753.33	656.74
27286	SRPX2	mRNA	1.35	0.95	0.83	3.7	3.6	2.73
50488	MINK1	mRNA	22.87	21.02	20.46	32.7	33.0	28.35
290	ANPEP	mRNA	187.55	171.09	165.25	319.97	321.48	262.15
10133	OPTN	mRNA	15.75	14.36	14.93	20.08	21.27	19.89
23464	GCAT	mRNA	1.15	0.9	1.05	2.19	2.45	2.22
489	ATP2A3	mRNA	7.71	7.56	7.41	10.83	11.9	10.95
475	ATOX1	mRNA	134.49	127.88	127.06	181.11	201.24	184.27
6556	SLC11A1	mRNA	64.62	58.94	59.19	103.55	118.24	105.29
221184	CPNE2	mRNA	7.35	7.07	6.98	9.92	10.62	10.22
25953	PNKD	mRNA	103.38	97.41	93.68	136.45	144.92	138.59
439921	MXRA7	mRNA	10.92	10.31	9.89	14.2	15.1	14.38
2768	GNA12	mRNA	22.37	21.11	21.95	31.94	33.61	30.65
9563	H6PD	mRNA	3.36	3.15	3.2	5.37	5.61	5.15
4084	MXD1	mRNA	18.27	17.55	17.88	28.86	30.08	27.76
6520	SLC3A2	mRNA	117.92	114.17	120.17	166.05	170.61	160.06
63027	SLC22A23	mRNA	1.13	0.95	1.21	2.91	3.08	2.81
80131	LRRC8E	mRNA	0.38	0.21	0.37	2.05	2.14	1.89
727936	GXYLT2	mRNA	0.21	0.15	0.2	0.54	0.57	0.5
284266	SIGLEC15	mRNA	11.45	9.53	10.61	23.72	25.14	23.24
202309	GAPT	mRNA	2.51	2.51	2.26	5.16	5.54	5.17
402665	IGLON5	mRNA	0.14	0.12	0.06	0.92	1.1	0.97
4067	LYN	mRNA	90.78	86.72	86.27	172.77	183.53	176.11
80149	ZC3H12A	mRNA	8.38	8.15	8.09	20.58	23.29	21.3
10288	LILRB2	mRNA	40.93	40.6	40.43	96.98	107.74	100.72
10859	LILRB1	mRNA	10.55	10.04	10.24	59.86	69.18	61.74
6648	SOD2	mRNA	135.26	132.22	130.15	280.38	318.53	280.17
952	CD38	mRNA	0.3	0.33	0.37	5.34	6.63	5.53
79993	ELOVL7	mRNA	1.29	1.31	1.32	2.52	2.89	2.57
64116	SLC39A8	mRNA	49.6	51.93	55.15	180.6	204.71	179.94
55365	TMEM176A	mRNA	26.1	24.92	25.98	90.76	104.39	92.26
92979	MARCH9	mRNA	4.21	4.02	4.01	9.71	10.68	9.62
4318	MMP9	mRNA	1461.14	1467.04	1332.55	6792.49	7712.7	6760.77
4501	MT1X	mRNA	24.19	27.94	27.52	204.13	233.94	193.84
4494	MT1F	mRNA	10.57	12.11	13.9	134.62	155.22	121.64
79586	CHPF	mRNA	4.97	4.8	4.76	12.38	14.09	11.72
4496	MT1H	mRNA	11.43	16.38	12.66	425.9	511.82	375.14
338773	TMEM119	mRNA	0.82	0.65	0.75	17.39	20.22	15.18
115509	ZNF689	mRNA	3.54	3.65	3.53	4.97	5.25	4.87
275	AMT	mRNA	1.19	1.28	1.09	2.87	3.27	2.76
23363	OBSL1	mRNA	1.94	1.97	1.89	3.37	3.72	3.3
28959	TMEM176B	mRNA	43.72	47.67	42.75	119.9	137.19	115.78
140688	NOL4L	mRNA	2.22	2.19	2.03	3.87	4.26	3.8
3732	CD82	mRNA	39.16	38.16	36.59	106.34	118.34	102.63
10318	TNIP1	mRNA	31.5	30.08	29.35	60.07	66.19	59.33
83891	SNX25	mRNA	2.95	2.58	2.44	3.86	4.14	3.89
3767	KCNJ11	mRNA	0.6	0.45	0.45	0.89	0.92	0.83
607	BCL9	mRNA	1.13	1.11	0.98	1.53	1.59	1.51
2121	EVC	mRNA	2.66	2.44	2.2	4.07	4.02	3.89
653513	LOC653513	pseudo	23.08	22.7	20.74	31.93	31.2	30.93
54828	BCAS3	mRNA	2.57	2.46	2.06	4.0	3.9	3.76
4828	NMB	mRNA	7.23	5.8	6.22	9.18	9.95	7.3
10000	AKT3	mRNA	2.54	2.1	2.4	3.57	3.74	2.7
79887	PLBD1	mRNA	25.02	21.45	23.18	33.52	34.81	27.94
8989	TRPA1	mRNA	0.18	0.12	0.14	0.33	0.36	0.22
116448	OLIG1	mRNA	0.13	0.02	0.06	0.36	0.5	0.23
57447	NDRG2	mRNA	37.64	33.77	35.7	75.67	89.54	50.38
113763	ZBED6CL	mRNA	0.72	0.56	0.65	1.25	1.45	0.84
26064	RAI14	mRNA	3.49	2.95	3.02	5.7	6.63	4.1
8797	TNFRSF10A	mRNA	2.42	2.18	2.39	3.23	3.77	3.11
2920	CXCL2	mRNA	30.75	27.07	28.28	39.74	47.28	38.86
23094	SIPA1L3	mRNA	2.29	2.0	1.96	2.88	3.25	2.83
65999	LRRC61	mRNA	2.86	2.34	2.56	4.01	4.39	3.88
6640	SNTA1	mRNA	3.08	2.24	2.56	4.07	4.76	4.02
107985524	LOC107985524	mRNA	0.53	0.41	0.4	0.67	0.76	0.6
2907	GRINA	mRNA	270.99	232.6	234.23	338.08	360.95	317.63
54796	BNC2	mRNA	2.63	2.17	2.21	3.22	3.39	3.02
9564	BCAR1	mRNA	1.01	0.61	0.81	1.48	1.51	1.17
149111	CNIH3	mRNA	5.2	3.77	4.62	6.81	7.54	6.17
11006	LILRB4	mRNA	88.28	89.23	83.47	132.08	150.13	131.73
4791	NFKB2	mRNA	15.22	15.53	14.81	21.38	24.63	22.21
7128	TNFAIP3	mRNA	5.42	5.44	5.29	11.0	13.58	11.3
7050	TGIF1	mRNA	15.4	15.09	14.68	20.89	23.74	21.34
65108	MARCKSL1	mRNA	5.07	5.57	5.33	56.11	72.89	62.66
3955	LFNG	mRNA	13.34	13.97	13.81	21.76	24.3	22.46
9021	SOCS3	mRNA	10.28	10.97	10.26	19.46	22.67	20.48
3586	IL10	mRNA	10.12	11.3	11.66	21.97	25.05	22.53
6285	S100B	mRNA	50.57	58.57	61.17	220.14	267.32	221.44
8870	IER3	mRNA	65.5	64.4	68.64	101.8	114.77	102.48
4493	MT1E	mRNA	7.84	9.3	10.08	43.23	57.71	43.0
10677	AVIL	mRNA	0.58	0.63	0.69	1.52	1.91	1.52
240	ALOX5	mRNA	32.76	35.1	34.47	66.8	75.1	62.98
2204	FCAR	mRNA	3.59	4.07	3.97	9.17	10.29	8.59
6091	ROBO1	mRNA	0.78	0.86	0.8	1.61	1.84	1.56
1514	CTSL	mRNA	1329.94	1394.37	1360.81	2117.21	2396.43	2096.11
2015	ADGRE1	mRNA	1.37	1.66	1.38	7.65	9.89	7.38
200407	CREG2	mRNA	0.4	0.55	0.48	1.06	1.34	1.07
782	CACNB1	mRNA	0.55	0.79	0.7	1.63	1.89	1.46
27202	C5AR2	mRNA	3.27	4.03	3.13	6.02	7.07	6.13
90668	CARMIL3	mRNA	1.17	1.44	1.12	2.95	3.44	2.77
6916	TBXAS1	mRNA	41.38	43.7	40.28	56.91	62.55	54.68
105372412	LOC105372412	mRNA	0.17	0.19	0.2	0.46	0.53	0.4
127544	RNF19B	mRNA	10.16	10.83	10.64	16.48	18.03	15.21
2919	CXCL1	mRNA	63.79	59.86	71.35	225.84	274.02	201.76
9050	PSTPIP2	mRNA	19.25	20.17	21.02	31.76	35.2	29.87
5816	PVALB	mRNA	12.18	11.65	10.95	41.39	48.47	33.61
27040	LAT	mRNA	6.37	6.33	5.69	27.08	33.93	21.98
65975	STK33	mRNA	0.12	0.11	0.12	0.74	0.95	0.57
1824	DSC2	mRNA	3.1	2.96	3.04	4.33	4.58	3.96
5199	CFP	mRNA	3.92	3.52	4.25	14.81	16.54	11.92
7138	TNNT1	mRNA	5.29	4.98	5.71	14.21	16.1	12.16
5798	PTPRN	mRNA	0.15	0.12	0.19	1.93	2.34	1.52
6279	S100A8	mRNA	84.54	69.95	75.39	186.08	231.24	181.88
3055	HCK	mRNA	177.99	173.46	171.62	240.92	266.18	237.63
53	ACP2	mRNA	81.44	71.56	76.67	120.77	135.51	118.19
5329	PLAUR	mRNA	293.79	269.19	279.73	439.84	494.21	414.25
2017	CTTN	mRNA	3.27	2.99	2.53	7.87	9.13	6.93
91	ACVR1B	mRNA	8.33	8.26	7.96	12.14	13.19	11.4
54103	GSAP	mRNA	11.66	11.07	10.93	16.15	17.19	15.43
65249	ZSWIM4	mRNA	2.01	1.97	1.86	4.2	4.65	3.83
4302	MLLT6	mRNA	11.05	10.58	10.66	18.6	19.92	17.12
10106	CTDSP2	mRNA	26.12	26.57	26.11	39.0	40.71	36.66
8111	GPR68	mRNA	16.78	17.0	16.05	27.9	29.17	25.72
5306	PITPNA	mRNA	53.64	53.48	54.21	74.73	78.65	71.48
79931	TNIP3	mRNA	2.38	2.45	2.53	15.32	17.64	13.18
4495	MT1G	mRNA	23.79	27.04	28.09	754.27	875.53	613.3
89790	SIGLEC10	mRNA	10.1	9.47	9.22	78.83	85.58	64.51
217	ALDH2	mRNA	8.38	7.95	8.39	24.43	26.04	21.65
3005	H1F0	mRNA	6.17	7.26	7.17	15.06	15.53	13.2
8793	TNFRSF10D	mRNA	2.94	3.32	3.2	5.58	5.89	5.02
2212	FCGR2A	mRNA	224.39	257.17	253.54	424.55	445.04	379.4
10666	CD226	mRNA	2.36	2.66	2.46	5.26	5.62	4.4
2355	FOSL2	mRNA	8.29	8.61	7.6	14.99	15.61	12.97
56917	MEIS3	mRNA	1.75	1.94	1.67	3.97	4.26	3.39
29940	DSE	mRNA	16.97	17.3	17.59	25.15	24.49	23.51
8875	VNN2	mRNA	1.91	2.66	3.27	17.25	17.49	14.0
5621	PRNP	mRNA	53.99	56.26	58.19	85.48	85.48	79.47
3597	IL13RA1	mRNA	36.11	36.18	37.6	54.68	54.94	49.18
4684	NCAM1	mRNA	0.15	0.14	0.18	0.51	0.5	0.42
9957	HS3ST1	mRNA	7.78	5.92	6.18	33.87	35.74	27.93
4053	LTBP2	mRNA	2.83	2.31	2.22	15.2	15.54	12.49
718	C3	mRNA	6.25	5.07	5.13	59.82	60.27	46.98
81607	NECTIN4	mRNA	3.55	3.58	3.31	8.3	8.36	6.97
79690	GAL3ST4	mRNA	3.14	3.0	3.47	37.03	37.75	28.46
27299	ADAMDEC1	mRNA	22.97	21.62	22.51	153.52	163.28	120.11
83667	SESN2	mRNA	5.94	6.39	5.89	8.81	8.93	8.31
4065	LY75	mRNA	0.9	1.11	0.89	2.63	2.71	2.45
7709	ZBTB17	mRNA	6.94	7.45	7.2	10.46	10.59	9.96
147645	VSIG10L	mRNA	2.49	2.63	2.56	4.13	4.24	3.93
57688	ZSWIM6	mRNA	8.27	8.67	8.33	12.78	12.94	12.03
23136	EPB41L3	mRNA	56.04	57.48	56.38	94.21	95.08	89.95
4499	MT1M	mRNA	0.62	1.05	0.56	26.16	28.28	24.07
25903	OLFML2B	mRNA	41.69	43.63	41.7	112.77	120.67	109.98
53947	A4GALT	mRNA	0.07	0.07	0.04	0.42	0.42	0.36
9693	RAPGEF2	mRNA	3.83	3.8	3.62	6.35	6.51	6.01
7097	TLR2	mRNA	76.24	75.05	77.25	120.52	121.84	113.01
55240	STEAP3	mRNA	17.44	16.54	16.82	60.47	62.43	55.64
4323	MMP14	mRNA	170.82	160.89	156.03	514.86	536.36	464.0
5872	RAB13	mRNA	58.42	66.73	60.71	85.26	96.64	77.55
285852	TREML4	mRNA	0.64	0.93	0.69	1.92	2.37	1.55
374378	GALNT18	mRNA	0.33	0.48	0.41	0.83	1.08	0.76
241	ALOX5AP	mRNA	217.11	242.79	238.14	302.47	350.77	282.64
9953	HS3ST3B1	mRNA	0.17	0.19	0.15	0.53	0.9	0.51
140606	SELENOM	mRNA	1.42	1.49	1.48	5.22	8.4	4.68
644090	LOC644090	mRNA	0.3	0.3	0.13	1.27	1.89	1.18
3553	IL1B	mRNA	61.3	67.97	67.18	177.37	239.67	162.39
4502	MT2A	mRNA	45.37	60.82	47.62	308.51	406.17	255.9
342510	CD300E	mRNA	4.07	5.34	4.68	18.65	24.68	16.43
10062	NR1H3	mRNA	47.53	45.59	47.22	70.67	85.1	63.29
84419	C15orf48	mRNA	17.12	15.01	17.38	51.79	67.26	40.06
118430	MUCL1	mRNA	0.21	0.11	0.19	1.03	1.38	0.72
4070	TACSTD2	mRNA	0.0	0.05	0.02	0.84	1.17	0.55
399665	FAM102A	mRNA	1.48	1.49	1.57	2.37	2.77	2.13
6372	CXCL6	mRNA	0.74	0.38	0.51	2.98	4.06	1.98
3576	CXCL8	mRNA	189.16	153.09	177.96	379.38	462.07	290.18
80380	PDCD1LG2	mRNA	4.9	4.39	4.73	8.24	9.44	6.76
353345	GPR141	mRNA	5.38	4.8	5.24	8.34	9.49	7.33
29992	PILRA	mRNA	147.33	130.08	135.73	231.1	261.53	205.27
100170841	EPOP	mRNA	1.53	1.51	1.38	2.94	3.43	2.28
6374	CXCL5	mRNA	55.64	44.47	47.45	960.31	1203.98	488.49
1594	CYP27B1	mRNA	1.01	1.06	0.96	3.53	4.22	2.05
4316	MMP7	mRNA	11.89	10.8	10.25	35.03	39.8	21.09
91283	MSANTD3	mRNA	11.93	11.76	12.84	18.5	20.18	15.99
728276	CLEC19A	mRNA	0.36	0.39	0.44	0.99	1.18	0.68
10544	PROCR	mRNA	36.37	34.28	39.81	85.05	104.5	63.46
4489	MT1A	mRNA	0.14	0.0	0.0	2.5	2.92	1.57
7076	TIMP1	mRNA	286.57	258.03	258.03	864.9	952.4	653.29
2359	FPR3	mRNA	58.65	53.33	57.04	114.45	117.05	90.97
22936	ELL2	mRNA	18.47	16.4	16.84	38.51	39.85	30.45
23601	CLEC5A	mRNA	79.01	78.36	78.72	188.31	190.46	144.39
7474	WNT5A	mRNA	0.01	0.02	0.02	0.55	0.59	0.33
1519	CTSO	mRNA	5.5	5.27	5.59	8.27	8.44	6.91
1645	AKR1C1	mRNA	9.5	7.18	7.96	34.66	39.67	22.34
4638	MYLK	mRNA	0.64	0.68	0.6	1.81	1.94	1.23
642938	INSYN2	mRNA	0.17	0.18	0.18	0.52	0.56	0.36
441518	RTL8B	mRNA	2.39	2.36	2.12	3.26	3.6	2.89
57458	TMCC3	mRNA	0.88	0.94	0.7	2.03	2.32	1.57
54210	TREM1	mRNA	10.87	10.36	8.72	22.42	25.05	18.0
48	ACO1	mRNA	21.75	20.59	19.1	29.85	31.85	24.76
9242	MSC	mRNA	7.1	5.99	5.65	14.28	15.91	10.96
4327	MMP19	mRNA	27.36	25.44	24.6	40.38	44.88	34.17
1902	LPAR1	mRNA	8.97	8.15	7.72	12.12	13.75	10.72
9659	PDE4DIP	mRNA	12.63	11.18	10.59	17.23	18.83	14.58
8444	DYRK3	mRNA	1.32	1.03	0.95	2.39	2.64	1.84
